# Supplementary material
Source: PubMed Central journal article supplement (PMC5070883)
Supplement: ejhg2015227x4.pdf [file ejhg2015227x4.pdf]

--LVKMDILLnGntvEELVtVVKDKAHSIGKAicERLKDLSIPRQLfEIAIQAAIGSKIIAREtVKAYR  
! \*!  
--LVKvnlVLVHGEPVDALtIARHDKAYSmARAIVDRLAIEVPRQLfEVPVQAAIGGKIIAREtVKALR  
--LRKVDILVnGEVVDALAVIVHEDKAYSLSGRKIVDKmAEVPRQLfPVPVQAAIGGKIIAREtVKAYR  
--LVKLDILVnDEKVDALAVIVHRDKAYSLSGRKIVDKmAEVPRQmFAVPIQAAIGGKIIAREtVRAFR  
---VKmnlILnGKPVdALAmIVHKLAAQSIGKAWvtKLKEVVPVPRQfEELSIAQAAIGAKVIARDnVKAFR  
--LVKMDILInGDPVDafASIVHRDKAEGKGRELcEKLADIIPAQmFKVAIQAAIGGKIIARDnVKEMR  
--LVKLDILInQAVDALatIVHKQKAYRVGKELVEKLNyIERQmfEvmIQAAIGSKIIARDtISAMR  
--LVKLDILVnGPIEALScIVHSSKABSRGRSIIQKLESIPRHLfKIALQAAVGSKILAREDIGA  
--IVRmDVLVnGIVDIALVHRtKARHGKDIIVARLQELPRQLfEIAIQAAIGSKIIAREDIRAFR  
--LVKMDVLVnQESVDALAmIVHRSQAERRGRHLcERLKDILPRQmfKIAIQAAIGGKIIAREDISAFR  
--LVKLDILIGGEVMDALSmIVHDKKAYYRGALVEERLKLIPRQmfEIPVQASIGnKVIAREnIKAMR  
--LVKVDILLQGEtVDAfSAIVHDKKAYGYGVAmTSLRRELIPRQfEVPVQAAIGSRRIAREnIRAIR  
--LVKVDILLQGEtVDAfSAIVHDKKAYGYGVAmTSLRRELIPRQfEVPVQAAIGSRRIAREnIRAIR  
--IVKLnLmLnGEIVBELtLrVHVSKARYGKIEicLRLAETIPRQmfQVAIQAVIGSKVVAREnVAAAL  
---VKmnlILnGKPVdALAmIVHkfaAQSIGKAWvtKLKEVVPVPRQfEELSIAQAAIGAKVIAREnVKAFR  
--LVKLDIRLnGEPVDALSSLIHRsNAyefGKKIcEKLKELEPRQfEIAIQASIGAKVIAREnVRALR  
--LVKMDImLnGEQVDALSSLIHRsNAyefGKKIcEKLRELIPRQfDIAIQASIGAKIIAREnVRALR  
---VKLDILLnGDPVDALStIVHADRAAtRGRQLAQLKEIIPQmfEIPVQAAIGnKIIAREnVRAMR  
--LVRLDILLnGEPVDALSSLIHRANsYdfGKKIcEKLRELIPRQfEIAIQASIGAKVIAREnVRAMR  
---VKLDILLnGDAVDALStIVHRDRAAQRGRQLatKLKEIIPQmfEIPVQAAIGSKIIAREnVRARR  
---VKLDILLnGDPVDALStIVHRDRAAQRGRQLatKLKEIIPQmfEIPVQAAIGSKIIAREnVRARR  
---VKLDILLnGDPVDALStIVHRDRAAQRGRQLAAKLKEIIPQmfEIPVQAAIGSKIIAREnVRARR  
---VKLDILLnGDPVDALStIVHRDRAAQRGRQLAAKLKEIIPQmfEIPVQAAIGSKIIAREnVRARR  
---VKLDILLnGDPVDALStIVHkDRAAQRGRQLAAKLKEIIPQmfEIPVQAAIGSKIIAREnVRARR  
--mVKVDILLnGDPVDALSAIVHRDRAAQRGRALVEKLRKIIPRQLfEIPVQAAIGSKIIAREnVSALR  
--mVKVDILLnGDPVDALSAIVHRDRAAQRGRALVEKLRKIIPRQLfEIPVQAAIGSKIIAREnVSALR  
--mVKVDILLnGDPVDALSAIVHRDRAAQRGRALVEKLRKIIPRQLfEIPVQAAIGSKIIAREnVSALR  
--LVRLDILLnGEPVDALSSIIIVHRDKAYHYGRALAIKLRtIPRQmfEVAIQAAIGGKIIARESI  
---VKLDILInGEPVDALAVIVHRDKAYHYGRALAIKLRtIPRQmfEVAIQAAIGQKIIARESISALR  
---VKLDILInGEAVDALAVIVHRDKAYHYGRALAIKLRtIPRQmfEVAIQAAIGQKIIARESISALR  
---VRLDILLnGEPVDALAVIVHRDKAYHYGRSLAIKLRtIPRQmfEVAIQAAIGQKIIARESISALR  
--LVKLDVLLnGEPVDALSSIVHRSKSYEwGRKLEKLGIPRQmfEVAIQAAIGSRVIARESISAMR  
--IVRLDVLInGQSDALAGLIHRDKAQRSGKAWvtRLKEILPRQLfEVIQAAVGSQKVLARESIAYK  
---VKLDILLnGDKVDALSAIVHRDKAYHYGRALVEKLRKEIIPRQfEIAVQAAIGtKVIARESVKALR  
---AKVDILVnGEPVDALSAIVHRDKAQvtGRQLAERLKLIPRQmfEIPVQAAIGSnVIARESVRAmR  
--LVKVDILLHGtVDAfSAIVHDKKAYAYGVRmtERLRELIPRQfEVPVQAAIGSRVIARESVRAmR  
--LVKmnILVnEPVDALSmIVHRSQAERRGRALcERLKDILPRHLfKIPVQAAIGAKVIAREtIAALR  
--LVKVSILVnGDPVDALSmIVHRDQAEGKRAIcIRLKLIVPRQmfKVAIQAAIGGKIIAREtIAALR  
--LVKMSILVnEPVDALSmIVHRSQAERRGRGmcERLKDILPRHLfKIPVQAAIGGKIIAREtIAAMR  
--LVKMSILVnEPVDALSmIVHRGtAESSRGRGmcERLKDILPRHLfKIPVQAAIGGKIIAREtIAAMR  
--LVRLDILLnGEPVDALsfIthKERAYQRGRQVAEKmKELIPRQmfEIAIQAAIGnKIIAREtIGA  
---VKVDVmVnGEQVDALsfIVHQDKAYtRARLLVEKLRKEIIPRQmfEVAIQAAIGSRRIAREtIGAmR  
--LEKVDVLVSGERVdALsfIVHKDRAYSRRGLLVEKLRKEIIPRQmfEVAIQAAIGSRRIAREtIGAmR  
--LVKMSILVnAEPVDALSmIVHRtRAESSRGRGmcERLKDILPRHLfQIPVQAAIGGKIIAREtIKA  
--LIKMDfLLnGQPVBEELAVIVHDKKAYSSGKAicERLsnSIPRQmfEIAVQAAIGSKIIAREtIKAfR  
--LIKmnILLnGQPVBEELitIVHRGRAYSAGKAmcERLKDLSIPRQmfEVAVQAAIGSKVIAREtIKAfR  
--LVKVDILLnGDKIDafSIIthKDSAYEKSRDLtKRLKDAIPRQmfEVPVQAtIGGKIIAREtIKAfR  
--LVKVDILLnSDKIDafSIIthKDRAYPAARELcEKLKnAIPRQmfEVPVQAtIGGKIIAREtIKAfR  
--LVKVDILVSGKVPDafSIIthKDRAYSRRGALcEKLREIVPRQfEIPVQAAIGSKVIAREtIKAfR  
--LVKLDILLnGDLIDafSIIIVHRDRAYnRGRALADKLDLIPRQmfEVPVQAVIGnKVIAREtIKAIR  
---VKVDVLInAnSVDALSALIHADnAYnIGKMcEKLRELIPRQfDIPVQAAIGAKIIAREtIKALR  
--LcKVDILInGEIVDALsfIVHDKKAYARALLVEKLRDVIIPRQLfEIPVQAAIGGRIAREtIKALR  
--LIRMDILLnAEOQLDALSAIVHRSNAyDLGKRicVKLRKELEPRQfEIPVQAAIGAKIIAREtIKALR

>sp!Q8N442!GUF1\_HUMAN-Translation-factor-GUF1,-mitochondrial-precursor-(EC-3.6.5.-)-----  
>tr!B7AA86\_THEAQ-Elongation-factor-4-precursor-(EC-3.6.5.n1)-(EF-4)-(Ribosomal-----  
>sp!Q1IXW5!LEPA\_DEIGD-Elongation-factor-4-(EC-3.6.5.n1)-(EF-4)-(Ribosomal-----  
>tr!D7CWN1\_TRURR-Elongation-factor-4-(EC-3.6.5.n1)-(EF-4)-(Ribosomal-----  
>tr!E6R5D2\_CRYGW-GTP-Binding-protein-lepA,-putative-[CGB\_D0630W]-[Cryptococcus-----  
>tr!C0A2X0\_9BACT-Elongation-factor-4-(EC-3.6.5.n1)-(EF-4)-(Ribosomal-----  
>sp!Q9FLE4!GUF1\_ARATH-Translation-factor-GUF1-homolog,-mitochondrial-precursor-(EC-----  
>tr!C5WH52\_STRDG-Elongation-factor-4-(EC-3.6.5.n1)-(EF-4)-(Ribosomal-----  
>sp!Q00ZZ1!GUF1\_OSTTA-Translation-factor-GUF1-homolog,-mitochondrial-precursor-(EC-----  
>tr!G2KPD4\_MICAA-Elongation-factor-4-(EC-3.6.5.n1)-(EF-4)-(Ribosomal-----  
>tr!C8W4T0\_DESAS-Elongation-factor-4-(EC-3.6.5.n1)-(EF-4)-(Ribosomal-----  
>sp!B8B2R1!GUF1\_ORYSI-Translation-factor-GUF1-homolog,-mitochondrial-precursor-(EC-----  
>sp!Q0RP81!LEPA\_FRAAA-Elongation-factor-4-(EC-3.6.5.n1)-(EF-4)-(Ribosomal-----  
>tr!E9GF27\_DAPPU-Putative-uncharacterized-protein-[DAPPUDRAFT\_49405]-[Daphnia-pulex-----  
>tr!Q5K8D2\_CRYNJ-GTP-Binding-protein-lepA,-putative-[CNL06110]-[Cryptococcus-----  
>tr!F4C2A9\_SPHS2-Elongation-factor-4-(EC-3.6.5.n1)-(EF-4)-(Ribosomal-----  
>sp!Q2NJE6!LEPA\_AYWPB-Elongation-factor-4-(EC-3.6.5.n1)-(EF-4)-(Ribosomal-----  
>tr!E4HM53\_PROAA-Elongation-factor-4-(EC-3.6.5.n1)-(EF-4)-(Ribosomal-----  
>tr!A6E8P9\_9SPHI-Elongation-factor-4-(EC-3.6.5.n1)-(EF-4)-(Ribosomal-----  
>tr!F5RKD2\_9FIRM-Elongation-factor-4-(EC-3.6.5.n1)-(EF-4)-(Ribosomal-----  
>tr!G5GP93\_9FIRM-GTP-binding-protein-lepA-[HMPREF9334\_01074]-[Selenomonas-infelix-----  
>tr!E0NZX6\_9FIRM-Elongation-factor-4-(EC-3.6.5.n1)-(EF-4)-(Ribosomal-----  
>tr!D0TB08\_9BACE-Elongation-factor-4-(EC-3.6.5.n1)-(EF-4)-(Ribosomal-----  
>tr!G5GZU4\_9FIRM-GTP-binding-protein-lepA-[HMPREF9432\_00561]-[Selenomonas-noxia-----  
>tr!D1RFN1\_LEGLO-Elongation-factor-4-(EC-3.6.5.n1)-(EF-4)-(Ribosomal-----  
>tr!G4Q642\_9FIRM-Elongation-factor-4-(EC-3.6.5.n1)-(EF-4)-(Ribosomal-----  
>tr!C0W9W6\_9FIRM-Elongation-factor-4-(EC-3.6.5.n1)-(EF-4)-(Ribosomal-----  
>tr!D2RKV8\_ACIFV-Elongation-factor-4-(EC-3.6.5.n1)-(EF-4)-(Ribosomal-----  
>tr!B5YHC9\_THEYD-Elongation-factor-4-(EC-3.6.5.n1)-(EF-4)-(Ribosomal-----  
>tr!G2HBK9\_9DELTA-Elongation-factor-4-(EC-3.6.5.n1)-(EF-4)-(Ribosomal-----  
>sp!B8DIZ5!LEPA\_DESVM-Elongation-factor-4-(EC-3.6.5.n1)-(EF-4)-(Ribosomal-----  
>sp!Q1MQF3!LEPA\_LAWIP-Elongation-factor-4-(EC-3.6.5.n1)-(EF-4)-(Ribosomal-----  
>sp!Q8KCH0!LEPA\_CHLTE-Elongation-factor-4-(EC-3.6.5.n1)-(EF-4)-(Ribosomal-----  
>tr!C1ECS2\_MICSR-Predicted-protein-[MICPUN\_84871]-[Micromonas-sp.-(strain-RCC299-/-)-----  
>tr!E4TSN5\_MARTH-Elongation-factor-4-(EC-3.6.5.n1)-(EF-4)-(Ribosomal-----  
>tr!F0DKW6\_9FIRM-Elongation-factor-4-(EC-3.6.5.n1)-(EF-4)-(Ribosomal-----  
>tr!C7Q5D1\_CATAD-Elongation-factor-4-(EC-3.6.5.n1)-(EF-4)-(Ribosomal-----  
>tr!F3Y4J2\_9FLAO-Elongation-factor-4-2-(EC-3.6.5.n1)-(EF-4-2)-(Ribosomal-----  
>tr!D5BT68\_PUNMI-Elongation-factor-4-(EC-3.6.5.n1)-(EF-4)-(Ribosomal-----  
>tr!D4Z6A0\_SPHJU-Elongation-factor-4-(EC-3.6.5.n1)-(EF-4)-(Ribosomal-----  
>tr!F6ET26\_SPHCR-Elongation-factor-4-(EC-3.6.5.n1)-(EF-4)-(Ribosomal-----  
>tr!E6EHN0\_PROAA-Elongation-factor-4-(EC-3.6.5.n1)-(EF-4)-(Ribosomal-----  
>tr!B6ARJ8\_9BACT-Elongation-factor-4-(EC-3.6.5.n1)-(EF-4)-(Ribosomal-----  
>tr!C6I0S2\_9BACT-Elongation-factor-4-(EC-3.6.5.n1)-(EF-4)-(Ribosomal-----  
>tr!B1M5P4\_ME'FRJ-Elongation-factor-4-(EC-3.6.5.n1)-(EF-4)-(Ribosomal-----  
>tr!E7FFK6\_DANRE-GUF1-GTPase-homolog-(S.-cerevisiae)-[guf1]-[Danio-rerio-(Zebrafish)-----  
>tr!G3Q4C3\_GASAC-Uncharacterized-protein-[GUF1]-[Gasterosteus-aculeatus-----  
>sp!A5IY50!LEPA\_MYCAP-Elongation-factor-4-(EC-3.6.5.n1)-(EF-4)-(Ribosomal-----  
>tr!D7WQK6\_9BACI-Elongation-factor-4-(EC-3.6.5.n1)-(EF-4)-(Ribosomal-----  
>tr!E5BYP2\_9FUSO-Elongation-factor-4-(EC-3.6.5.n1)-(EF-4)-(Ribosomal-----  
>sp!Q5ZUD2!LEPA\_LEGPH-Elongation-factor-4-(EC-3.6.5.n1)-(EF-4)-(Ribosomal-----  
>tr!F9YVJ7\_CAPCC-Elongation-factor-4-(EC-3.6.5.n1)-(EF-4)-(Ribosomal-----  
>tr!D9S2N8\_THEOJ-Elongation-factor-4-(EC-3.6.5.n1)-(EF-4)-(Ribosomal-----  
>tr!F2KL08\_PSEBN-Elongation-factor-4-(EC-3.6.5.n1)-(EF-4)-(Ribosomal-----



---VKVDILVSGKPVDAfSfIAHnDnAfYRGAiCQKLEVIPRQqFEIPIQAALGSKIIAREtIKAYR  
---VRLDILHnGRPVBELLatIVQRDRAYStGKSmcERLKDAlPRQmFfEIAIQAAcVGSKVLAREtIKAYR  
---LlKMDILLnGKVPBELLatIVQRDRAYStGKSmcERLKDAlPRQmFfEIAIQAAcVGSKIIAREtIKAYR  
---LlKVDVLLnGKIDALAIIVHKDFAYSRGRDLtVklKEVIPRQnFfEIPVQAAIGAKVIAREtIKAYR  
---LVKLDILLnGQKIDALSmIVHKDFAYPKARDLtQRlKnIIPRHfSEVPVQAVIGSKVIAREtIKAYR  
---LVKVDILLnGDKIDAFsIIItHKDSAYSskARDLtQlKEAlPRQnFfEVPVQAtIGSKIIAREtIKAYR  
---LVKVDILLnGDKIDAFsIIItKQDSAYSPrARELcEKLKAEIIPRQnFfEVPVQAVIGSKIIAREtIKAYR  
---LVKVDILLnGDKVDfSfIISHKDNAYASGRELcEKLKAEIIPRQnFfEIPVQAtIGGKIIAREtIKAYR  
---LVKVDILLnGKIDALAmIVHRDSAYnKSRALtEKLKEVVPRQnFfEIPVQAAIGAKIIAREtIKAYR  
---LVKVDILLnGKVDfSfIAHKDKAYEHARELcIKLkDEIPRQnFfEIPVQAtIGGKIIAREtIKAYR  
---LVKVDILVSGKPVDAfSfIAHKDAYSrGRAicEKLKEVIPRQqFEIPIQAALGAKVIAREtIKAYR  
---LVRmEILLnGnPVBELGSIVHKDKAAAVGRVvcERLkDSLPRQfEIAIQAAVGSKIIAREtIKAYR  
---AKLDILLnGEPVDALSAltHQDnAVtIGRkMcEKLKDLIPRQqFDIAIQAAIGKIVAREtIKcVR  
---LAKLDILLnGEPVDALStLthQDnAVtLGRKMcEKLKDLIPRQqFDIAIQAAIGKIVAREtIKcVR  
---LAKLDILLnGEPVDALStLthQDnAVtLGRKMcEKLKDLIPRQqFDIAIQAAIGKIVAREtIKcVR  
---LVKLDILLnGEPVDALStLthVdNsvTfGQRmCekLkELIPRQqFEIAIQAAIGAKIIAREtIKPVR  
---LVKLDILLnGEPVDALStLthVdNsvTfGRRmCekLkELIPRQqFEIAIQAAIGAKIIAREtIKPVR  
---VKVDILVSGKAVDAfSfIAHSDSAYtRGRAicEKLKDVIPRQqFEIPIQAALSSKIIAREtIKPYR  
---VKVDILVSGKPVDAfSfIAHnDSAYtRGRAicEKLKDVIPRQqFEIPIQAALSSKIIAREtIKPYR  
---LAKLDILLnGEPVDALStLthEtNvTfGRRicEKLKDLIPRQqFDIAIQAAIGAKIIAREtIKQVR  
---LVKVDILLnGKIDALAmIVHRDfAYnKSRDLtEKLKEVIPRQnFfEIPVQAAIGAKIIAREtIKSYR  
---LVKMDILVnEvVDALSLItHRDQAYQRGRALVERLRLIPRQlFdvPIQAAIGSRVIAREtIPALR  
---LVRDLILInGDVvDSLStIVHRDKAfYVGRSLVAKLRELIPRHFfEVPVQAAIGSKVIAREtIPALR  
---LVRDLILInGDVvDSLStIVHRDKAfYVGRSLVAKLRELIPRHFfEVPVQAAIGSRVIAREtIPALR  
---LVKMSILVnAEPVDALSmLVHrtRABSRGRAMcEKLKDLIPRHfFQIPVQAAIGGKIIAREtIRA  
---LVKMSILVnSEPVDALSmLVHrtRABSRGRAMcEKLKDLIPRHfFQIPVQAAIGGKIIAREtIRA  
---LVRDLVlVAGELVDALSVIVHRDKAYARGRALVERLkELIPRQlFfEVPVQAAVGSRVAREtIRA  
---LVRDLVlVAGEPVDALSVIVHRDKAYARGRALVERLkELIPRQlFfEVPVQAAVGSRVAREtIRA  
---LVKVDILVSGnPVDAfSfIISHADHASSRGRAicEKLKEIIPRQqFEIPIQAALGAKIIAREtIRAFr  
---LVKVDILLQGEtVDAfSAIVHKDKAYAYGVmmtAKLkDLIPRQqFEVPVQAAIGSRIIAREtIRAIR  
---VKVDILInQOPVBEALSmILHRDLAASQGRALVERLRGIIPRQlFfEVPVQAAIGSRIIAREtIRALR  
---VKVDILLnGDKVDafSAIVHRDSAYSyGvmmtKRLKDLIPRQqFEVPVQAAIGtRVIAREtIRALR  
---LlKLSILVnGnPVDALStIVHRDKAEfRGRLEcKRLKDLIPAHfQIAIQAAIGSRIIAREtIRALR  
---LVKLDILVnGQPVDAfSLIVHRDfAYQRGRDLVERLRLIPRQmFfEVPVQAAIGSKIIAREtIRALR  
---LVKLDILVnGQPVDALSLIVHRDfAYQRGRDLVERLRLIPRQmFfEVPVQAAIGSKVIAREtIRALR  
---LVKMDILInGERVDALSVIVHRDQAYHRGKALAEKLKELIPRQmFfEVPVQAAIGSKIIAREtIRALR  
---LVKMDILInQEVVDafSLIVHQDKAYERGRKicERLteAlPRHfQfAVPIQAAIGSKIIAREtIRALR  
---LVKMDILInSELVDAfSmIVHKDtAYARGRRicEKLtDVIPRHfQfAIPVQAAIGAKIIAREtIRALR  
---LVKMSILVnAEPVDALSmLVHrtRABSRGRAMcEKLKDLIPRQHLfEIPVQAAIGAKIIAREtIRALR  
---LVKVDILLnGDKVDafSAIVHKDSAYSyGvmmtKRLKELIPRQqFEVPVQAAVGSRIIAREtIRALR  
---LVKVDILLnGDKVDafSAIVHRDSAYSyGvmmtKRLKDLIPRQqFEVPVQAAIGtRVIAREtIRALR  
---LVKVDILLnGERVDafSAVHRDAAAYSyGvmmtAKRLKDLIPRQqFEVPVQAAVGARIIAREtIRALR  
---LVKVDILVSGnVVDafSfIAHKDHafnRGRSIVERLKEVIPRQqFEIPLQAALGSKIIAREtIRALR  
---VKLDILLnGEBADALSfIVHKDKAYERGRIVcEKLKEIIPRQlFfEVPVQAAIGSRVIAREtIRAmR  
---VKLIDILLnGEBVDAfSfIVHKDKAYERGRIVcEKLKEIIPRQlFfEVPVQAAIGSRVIAREtIRAmR  
---LVKLDILVnGQPVDALSLIVHRDfAYAQGRALVERLRKLIIPRQmFfEVPVQAAIGSKVIAREtIRAmR  
---LVKLDILVnGQPVDALSLIVHRDfAYAQGRALVERLRKLIIPRQmFfEVPVQAAIGSKVIAREtIRAmR  
---LVKVDILLQGEQVDafSAIVHKDKAYAYGVQmtAKLkDLIPRQqFEVPVQAAIGSRIIAREtIRAmR  
---LVRMDILInGEPVDALSSIVHRDRAYQRGRALcERLkELIPRQlFfEVPVQASIGnRVIAREtIRAmR  
---VKMDILLnGEBVDAfSfIVHRDKAYHRGRQLVERLRLIPRQmFfEVPVQAAIGnKVVAREtIRAQR  
---AKMEILLnGtPVDAfSfIVHEEKARItGKQVcQKLEAlPRQlYEVAlQAtIRGKVVAREtIRA VR  
---LVKVDILLnGDPVDALSSIVHRDKSAYSyGvMAAAKLELIPRQqFEVPVQAAIGARVIAREtIRA VR  
---LVKVDILLnGDPVDALSSIVHRDKSAYSyGvMAAAKLELIPRQqFEVPVQAAIGARVIAREtIRA VR  
---LVKVDILLnGDPVDALSSIVHRDKSAYSyGvMAAAKLELIPRQqFEVPVQAAIGARVIAREtIRA VR  
---LVKVDILLnGDPVDALSSIVHRnKSYSYGvMAAAKLELIPRQqFEVPVQAAIGARVIAREtIRA VR

>tr!G6C577\_9FUSO-Putative-uncharacterized-protein-[HMPREF9093\_01723]-[Fusobacterium-----  
>tr!B4NCH5\_DROWI-GK25080-[GK25080]-[Drosophila-willistoni-(Fruit-fly)]-----  
>tr!Q4TCa6\_TETNG-Chromosome-1-SCAF7036,-whole-genome-shotgun-sequence.--(Fragment)-----  
>sp!Q6KHP1!LEPA\_MYCMO-Elongation-factor-4-(EC-3.6.5.n1)-(EF-4)-(Ribosomal)-----  
>tr!D5AWJ8\_RICPP-Elongation-factor-4-(EC-3.6.5.n1)-(EF-4)-(Ribosomal)-----  
>sp!Q8GCP5!LEPA\_MYCFE-Elongation-factor-4-(EC-3.6.5.n1)-(EF-4)-(Ribosomal)-----  
>tr!F9UJY2\_9MOLU-Elongation-factor-4-(EC-3.6.5.n1)-(EF-4)-(Ribosomal)-----  
>tr!F9QEM8\_9MOLU-Elongation-factor-4-(EC-3.6.5.n1)-(EF-4)-(Ribosomal)-----  
>tr!E8T0E8\_GEOS2-Elongation-factor-4-(EC-3.6.5.n1)-(EF-4)-(Ribosomal)-----  
>sp!Q4A5S3!LEPA\_MYCS5-Elongation-factor-4-(EC-3.6.5.n1)-(EF-4)-(Ribosomal)-----  
>tr!C3WB59\_FUSMR-Elongation-factor-4-(EC-3.6.5.n1)-(EF-4)-(Ribosomal)-----  
>tr!F7CM81\_ORNAN-Uncharacterized-protein-[100085632]-[Ornithorhynchus-----  
>tr!G6B229\_9BACT-GTP-binding-protein-LepA-[HMPREF0673\_02960]-[Prevotella-stercorea-----  
>tr!D3IA24\_9BACT-Elongation-factor-4-(EC-3.6.5.n1)-(EF-4)-(Ribosomal)-----  
>tr!D1VX24\_9BACT-Elongation-factor-4-(EC-3.6.5.n1)-(EF-4)-(Ribosomal)-----  
>sp!B0BWV5!LEPA\_RICRO-Elongation-factor-4-(EC-3.6.5.n1)-(EF-4)-(Ribosomal)-----  
>tr!Q55ME0\_CRYNB-Putative-uncharacterized-protein-[CNBI0720]-[Cryptococcus-----  
>tr!E5BLl2\_9FUSO-Elongation-factor-4-(EC-3.6.5.n1)-(EF-4)-(Ribosomal)-----  
>tr!E6LK47\_9FIRM-Elongation-factor-4-(EC-3.6.5.n1)-(EF-4)-(Ribosomal)-----  
>tr!D1XXV9\_9BACT-Elongation-factor-4-(EC-3.6.5.n1)-(EF-4)-(Ribosomal)-----  
>sp!B3PLU0!LEPA\_MYCA5-Elongation-factor-4-(EC-3.6.5.n1)-(EF-4)-(Ribosomal)-----  
>sp!Q2RKX8!LEPA\_MOOTA-Elongation-factor-4-(EC-3.6.5.n1)-(EF-4)-(Ribosomal)-----  
>sp!Q2JQ51!LEPA\_SYNJB-Elongation-factor-4-(EC-3.6.5.n1)-(EF-4)-(Ribosomal)-----  
>tr!A3ESM4\_9BACT-Elongation-factor-4-(EC-3.6.5.n1)-(EF-4)-(Ribosomal)-----  
>sp!B0UFE0!LEPA\_METS4-Elongation-factor-4-(EC-3.6.5.n1)-(EF-4)-(Ribosomal)-----  
>sp!B8IMT0!LEPA\_METNO-Elongation-factor-4-(EC-3.6.5.n1)-(EF-4)-(Ribosomal)-----  
>tr!F0IFG7\_9FLAO-Elongation-factor-4-(EC-3.6.5.n1)-(EF-4)-(Ribosomal)-----  
>tr!E8UH82\_MYCFM-Elongation-factor-4-(EC-3.6.5.n1)-(EF-4)-(Ribosomal)-----  
>tr!E3IRM7\_DESVR-Elongation-factor-4-(EC-3.6.5.n1)-(EF-4)-(Ribosomal)-----  
>tr!F4H3E0\_CELFA-Elongation-factor-4-(EC-3.6.5.n1)-(EF-4)-(Ribosomal)-----  
>tr!B3T1M5\_9ZZZZ-Putative-GTP-binding-protein-LepA-C-terminal-domain-----  
>tr!F9PJN0\_9ACTO-Elongation-factor-4-(EC-3.6.5.n1)-(EF-4)-(Ribosomal)-----  
>sp!B3CRQ1!LEPA\_ORITI-Elongation-factor-4-(EC-3.6.5.n1)-(EF-4)-(Ribosomal)-----  
>tr!B8G617\_CHLAD-Elongation-factor-4-(EC-3.6.5.n1)-(EF-4)-(Ribosomal)-----  
>tr!B9LBP0\_CHLSY-Elongation-factor-4-(EC-3.6.5.n1)-(EF-4)-(Ribosomal)-----  
>tr!G2MR57\_9THEO-Elongation-factor-4-(EC-3.6.5.n1)-(EF-4)-(Ribosomal)-----  
>tr!F9MS26\_9FIRM-Elongation-factor-4-(EC-3.6.5.n1)-(EF-4)-(Ribosomal)-----  
>tr!E4KTM0\_9PORP-Elongation-factor-4-(EC-3.6.5.n1)-(EF-4)-(Ribosomal)-----  
>tr!E8QAW8\_STRED-Elongation-factor-4-(EC-3.6.5.n1)-(EF-4)-(Ribosomal)-----  
>tr!C0W2Y9\_9ACTO-Elongation-factor-4-(EC-3.6.5.n1)-(EF-4)-(Ribosomal)-----  
>tr!E7NCA7\_9ACTO-Elongation-factor-4-(EC-3.6.5.n1)-(EF-4)-(Ribosomal)-----  
>tr!F9EGB5\_9ACTO-Elongation-factor-4-(EC-3.6.5.n1)-(EF-4)-(Ribosomal)-----  
>tr!D4HD61\_PROAS-Elongation-factor-4-(EC-3.6.5.n1)-(EF-4)-(Ribosomal)-----  
>tr!C8WY50\_ALIAD-Elongation-factor-4-(EC-3.6.5.n1)-(EF-4)-(Ribosomal)-----  
>tr!F8IF57\_ALIAT-Elongation-factor-4-(EC-3.6.5.n1)-(EF-4)-(Ribosomal)-----  
>tr!A7NJP1\_ROSCS-Elongation-factor-4-(EC-3.6.5.n1)-(EF-4)-(Ribosomal)-----  
>tr!A5USY2\_ROSS1-Elongation-factor-4-(EC-3.6.5.n1)-(EF-4)-(Ribosomal)-----  
>tr!D7AI47\_GEOSK-Elongation-factor-4-(EC-3.6.5.n1)-(EF-4)-(Ribosomal)-----  
>tr!D5WXM9\_BACT2-Elongation-factor-4-(EC-3.6.5.n1)-(EF-4)-(Ribosomal)-----  
>tr!F5SE42\_9BACT-GTP-binding-protein-LepA-[lepA]-[Desmospora-sp.-8437]-----  
>sp!B3RXR7!GUF1\_TRIAD-Translation-factor-GUF1-homolog,-mitochondrial-precursor-(EC-  
>tr!G4D038\_9ACTO-Elongation-factor-4-(EC-3.6.5.n1)-(EF-4)-(Ribosomal)-----  
>tr!D7M1G6\_ARALL-Putative-uncharacterized-protein-[ARALYDRAFT\_487706]-[Arabidopsis-----  
>tr!F3P011\_9ACTO-Elongation-factor-4-(EC-3.6.5.n1)-(EF-4)-(Ribosomal)-----  
>tr!F9NTW6\_PROAA-Elongation-factor-4-(EC-3.6.5.n1)-(EF-4)-(Ribosomal)-----

--LVKLLDVLInGQVInELStIVHKDKAYPVGKtLASKLKDVIPRQLYEVVVIQAAIGnKVIAREtIRAYK  
---VRLDILLnGEAVDALAVIVHKDKSAYRGRALALKLKRtIPRQmFEVAIQAAIGQKVIAREtISALR  
--LVKLDILLnGEQVDALSLVHrtKASERGLKAcERLKEEIPRQmFKIAIQAAIGnKVIAREtISALR  
--LVKLEIKLnGEVnDALSALVHRSKAEsfGRKICtERLKEELPRQQfEIAIQAAIGnKVIAREtISALR  
--LVKMDILLnSEVVDALsfIVHKDtAYARGKVicEKLELIPRQQfEVPVIAQIghKVVAREtISALR  
--LVKVSILLnGDPVDALAmIVHREQAfYRGRAlcARLKDILPRQmFKIAIQAAIGGKVIAREtISALR  
---VRLDILLnGEAVDALAVIVHRDKAYHYGRALALKLKRtIPRQLfEVAIQAAIGQKVIAREtISAmr  
--IAKMDILLnGDKVDALSLIHRSKRAQDfGRKLCERLKEELPRQQfEIAIQAAIGnKVIAREtISAmr  
--IVRMDVLnGSVVdALAtIVHRSKRAQHGRLDLVARELKEALPRQmFEVAIQAAIGnKVIAREtISAmr  
--LARLDILLnGEPVDALSVIVHRDRAYLRGREVcQKLEKVIKQmFEVAIQAAIGAKVIAREtISAmr  
--LVKLDILLnGQPVdAmAtIVHnLKAQRVGRLEVDKLLKfIDRQmFEItIQAAIGSKVIAREtISAmr  
--LVKLDILLnGQPVdAmAtIVHnLKAQRVGRLEVEKLLKfIDRQmFEItIQAAIGSKIIAREtISAmr  
--LVKLDILLnGQVDAmAtIVHKLKAQRIGRELVKLLKfIDRQmFEItIQAAIGAKVIAREtISAmr  
--LVKLDVLInGEPVDALSSIVHRSKYEwGRKLCsKLLKGIIPRQmFEVAIQAAIGSRVAREtISAmr  
--LVKLDVLInGESVDALStIVHRSKAYEwGRRLcQKLSIIPRQmFEVAIQAAIGSRVAREtISAmr  
--LVKLDVLInGtVDALSSIVHRSKAYDwGRKLCcLKLKGIIPRQmFEVAIQAAIGnRVIAREtISAmr  
--LVKMDILLnGEIVDALsfIVHtDtAYPRGKVicEKLRKLIPRQQfEVPVIAQIGQKIVAREtISAmr  
--LVKMSILVnAEPVDALStIVHRSQAfHRGRLLcERLKEELIPRQLfKIAVQAAIGSRVAREtISAmr  
--LcRLDILLnGEPVDALSSIVHVKAEfGRGRALcSRLKEELPRQmFKIAIQAAIGKVVAREtISAYR  
--ISKLTlInSEPVdALScIIHKSQVSRGREIcERLKDILPRQQYKVAIQAAIGAKIVAREtISPYR  
--VSKLtlInSELVDALAcIIHKSQVSRGREIcERLKDILPRQQYKVAIQAAIGSKIVAREtISPYR  
---VRMDILLnQLVDELctVVHISKAQSHAKELVLKLELIPRQmVQIAIQAAIGKVVAREtLKAYR  
---VRMDVLInGtLVDELctVVHISKAQSHARELVLKLELIPRQmVQIAIQAAIGKVVAREtLKAYR  
--LIKMDILLnGnPIBELAtIIHnDKAYAtGKfLcERLKDILPRQLfEIAIQAAIGKIIAREtLKAYR  
--LIKMDILLnGnPVBELStIIHnDKAYAtGKfLcERLKDILPRQLfEIAIQAAIGKIIAREtLKAYR  
---VKLDILLnGKmVQELStIVHAEKAHQtGKKIcVKLLEIIPQQLfEIAIQAAIGKVVAREtLKPYK  
--IVKLDILLnGKLVBELStIVHtKAYKtGKLLcAKLLEtIPRQLfEIAIQAAIGnKVIAREtLKPYK  
--LVKLnILLnGKmVBELctIVHrtKAtQIGKLLcIKLLDtIPRQLfEIAIQAAIGSKIIAREtLKPYK  
--IVKLnILLnGKLVBELctIVHrtKAtQIGKLLcIKLLDtIPRQLfEIAIQAAIGSKIIAREtLKPYR  
--LVKLDILLnGQPVdALAScHRSKAHYVGRLEcEKLLKVLDRQmFEVAIQAAIGAKVVAREtLPALR  
---VKMQVLVnDEPVDALStmVHRDRAEfARGRAmCEKLLKDILPRHmfKIPIQAAIGKVIAREtLSALR  
---VKMSILVnDEPVDALStmVHRDRAEfARGRAmCEKLLKDILPRHmfKIPIQAAIGKVIAREtLSALR  
---VKMSVLVnDEPVDALStmVHRDRAEfARGRAmCEKLLKDILPRHmfKIPIQAAIGKVIAREtLSALR  
---VKMSVLVnDEPVDALStmVHRDRAEfARGRAmCEKLLKDILPRHmfKIPIQAAIGKVIAREtLSALR  
--LVKLDILLnGELVDALsfIVHEEKVGRGRAItKLLKESIPRQmFEIPIQAAIGnKIIAREtLSALR  
--mVKLDVImLnGDRVDALSAIVHRSKSYEwGKLLcEKLELIPRQQfEIAIQAAIGQKIIAREtLSALR  
--LVKMDILLnGQPVdAmAtIIHnQKAQKVGRELVDKLLKfIERQmFEItIQAAIGSKIIAREtLSAmr  
--LVKMDILLnGQPVdAmAtIIHnQKAQKVGRELVDKLLKfIERQmFEItIQAAIGSKVIAREtLSAmr  
--LVKMDILLnGQPVdAmAtIVHnQKAQRVGRLEVEKLLKfIERQmFEItIQAAIGSKVIAREtLSAmr  
--LVRVDILLnGdTvDALsALLHADnAYtIGKKIVEKLLKtLIPRQQfDIPVIAQIGAKIIAREtKALR  
--LVRVDILLnGtPVDALSALLHADnAYSIGKRIVEKLLKELPRQQfDIPVIAQIGAKIIAREtKALR  
---VKLDILLnGELVDALSmIVHKDKAYEKARKIVEKLLKEnIPRHfEIPVIAQIGSKIIAREtV  
---VKLDILLnGELVDALSmIVHKDKVYEKARKIVEKLLKEnIPRHfEIPVIAQIGSKIIAREtV  
--LVKMDILLnKEQVDALsfIIHtRAfVGRGAmCEKLLKDEIPRHfEPVPIQAAIGnKIIAREtVAAYR  
---VKLDILLnGELVDALSmIVHKDKAYEKARKIVEKLLKEnIPRHfEIPVIAQIGSKIIAREtVKA  
--LVKLDVLVSGEQVDALSLIHRDnAYARGRALVEKMKELIPRQLfEVPVIAQIGnRVIAREtVKA  
--LVKLDILLnGEPVDALSVIVHRRERAYHRGRELcQKLRVfIPKQmFEVAIQAAIGAKIIAREtVKAfr  
--LVKLDILLnGEPVDALSVIVHRRERAYQRGRDLcQRLREVIPKQmFEVAIQAAIGAKVIAREtVKAfr  
--LVKLDImLnGEIVDALsfIVHREKSVARGRRmAEKLLKESIPRQmFEIPIQAAIGKIIAREtVKAfr  
--LVKLDImLnGEVVDALsfIVHADKAYARGRRmtEKLLKEnIPRHmfEIPVQAcIGKIIAREtVKAfr  
--LVKLDImLnSEVVDALsfIVHREKSVtRGRmAEKLLKESIPRQmFEIPIQAcIGKIVAREtVKAfr  
---VKLDVLInGDPVDALSAIVHRDKAYEwGKLLcEKLELIPRQQfEIAIQAAIGAKVIAREtVKAfr  
--LVKLDILLSGKPIDALSfIVHKDKAYDRGRVLAELKLGIIIPRQmFEVPIQAAIGGRVLAAREtVKAfr  
--LVKLDILLSGKPIDALSfIVHKDKAYDRGRVltEKLEIIPRQmFEVPIQAAIGGRVLAAREtVKAfr

>tr|C3XWB6\_BRAFL-Putative-uncharacterized-protein-[BRAFLDRAFT\_117127]-[Branchiostoma-----  
>tr|G1V2S7\_9DELTA-Elongation-factor-4-(EC-3.6.5.n1)-(EF-4)-(Ribosomal-----  
>tr|E8RDF7\_DESPD-Elongation-factor-4-(EC-3.6.5.n1)-(EF-4)-(Ribosomal-----  
>tr|F4KZL9\_HALH1-Elongation-factor-4-(EC-3.6.5.n1)-(EF-4)-(Ribosomal-----  
>tr|C0ZB42\_BREBN-GTP-binding-protein-LepA-[lepA]-[Brevibacillus-brevis-(strain-47/------  
>tr|G5ZXG5\_9PROT-GTP-binding-protein-LepA-[HIMB100\_00007140]-[SAR-116-cluster-alpha-----  
>tr|A8SE73\_9FIRM-Elongation-factor-4-(EC-3.6.5.n1)-(EF-4)-(Ribosomal-----  
>tr|C7PDZ4\_CHIPD-Elongation-factor-4-(EC-3.6.5.n1)-(EF-4)-(Ribosomal-----  
>sp|A4S3R2|GUF1\_OSTLU-Translation-factor-GUF1-homolog,-mitochondrial-precursor-(EC-----  
>tr|E3FMN4\_STIAD-Elongation-factor-4-1-(EC-3.6.5.n1)-(EF-4-1)-(Ribosomal-----  
>sp|B9RUN8|GUF1\_RICCO-Translation-factor-GUF1-homolog,-mitochondrial-precursor-(EC-----  
>tr|F6H5P1\_VITVI-Putative-uncharacterized-protein-[VIT\_14s0108g00130]-[Vitis-----  
>tr|B9IJU6\_POPT- Predicted-protein-(Fragment)-[POPTRDRAFT\_258992]-[Populus-----  
>sp|B3QPJ3|LEPA\_CHLP8-Elongation-factor-4-(EC-3.6.5.n1)-(EF-4)-(Ribosomal-----  
>sp|A9N944|LEPA\_COXBR-Elongation-factor-4-(EC-3.6.5.n1)-(EF-4)-(Ribosomal-----  
>tr|B3QXN4\_CHLT3-Elongation-factor-4-(EC-3.6.5.n1)-(EF-4)-(Ribosomal-----  
>tr|F7U082\_BRELA-Elongation-factor-4-(EC-3.6.5.n1)-(EF-4)-(Ribosomal-----  
>tr|G5GWI5\_FUSNP-GTP-binding-protein-LepA-[HMPREF9369\_01381]-[Fusobacterium-----  
>tr|D5EPP9\_CORAD-Elongation-factor-4-(EC-3.6.5.n1)-(EF-4)-(Ribosomal-----  
>sp|Q5PAX8|LEPA\_ANAMM-Elongation-factor-4-(EC-3.6.5.n1)-(EF-4)-(Ribosomal-----  
>sp|Q2GJV7|LEPA\_ANAPZ-Elongation-factor-4-(EC-3.6.5.n1)-(EF-4)-(Ribosomal-----  
>sp|Q0IFX5|GUF1\_AEDAE-Translation-factor-GUF1-homolog,-mitochondrial-precursor-(EC-----  
>sp|B8AI54|GUF1\_ORYSI-Translation-factor-GUF1-homolog,-chloroplastic-precursor-(EC-----  
>tr|G1NHQ6\_MELGA-Uncharacterized-protein-(Fragment)-[GUF1]-[Meleagris-gallopavo-----  
>tr|F1NX95\_CHICK-Uncharacterized-protein-(Fragment)-[Gga.39342]-[Gallus-gallus-----  
>tr|G7V117\_LACRH-GTP-binding-protein-LepA-[lepA]-[Lactobacillus-rhamnosus-ATCC-8530]-----  
>tr|B3JGT2\_9BACE-Elongation-factor-4-(EC-3.6.5.n1)-(EF-4)-(Ribosomal-----  
>tr|G3Q4C0\_GASAC-Uncharacterized-protein-(Fragment)-[GUF1]-[Gasterosteus-aculeatus-----  
>tr|E9JD47\_SOLIN-Putative-uncharacterized-protein-(Fragment)-[SINV\_02352]-----  
>sp|A9S3D3|GUF1\_PHYPA-Translation-factor-GUF1-homolog,-mitochondrial-precursor-(EC-----  
>sp|B1ZC10|LEPA\_METPB-Elongation-factor-4-(EC-3.6.5.n1)-(EF-4)-(Ribosomal-----  
>sp|Q5LU50|LEPA\_SILPO-Elongation-factor-4-(EC-3.6.5.n1)-(EF-4)-(Ribosomal-----  
>tr|B9NPG9\_9RHOB-Elongation-factor-4-(EC-3.6.5.n1)-(EF-4)-(Ribosomal-----  
>sp|Q1GIV5|LEPA\_SILST-Elongation-factor-4-(EC-3.6.5.n1)-(EF-4)-(Ribosomal-----  
>tr|E3GFV8\_EUBLK-Elongation-factor-4-(EC-3.6.5.n1)-(EF-4)-(Ribosomal-----  
>tr|D2QIF4\_SPILD-Elongation-factor-4-(EC-3.6.5.n1)-(EF-4)-(Ribosomal-----  
>tr|D7SWK1\_VITVI-Putative-uncharacterized-protein-[VIT\_07s0031g03050]-[Vitis-----  
>tr|B4ARZ9\_FRANO-GTP-binding-protein-LepA-[lepA]-[Francisella-novicida-FTE]-----  
>sp|C5Z3W1|GUF1\_SORBI-Translation-factor-GUF1-homolog,-mitochondrial-precursor-(EC-----  
>sp|Q5VQ69|GUF1\_ORYSJ-Translation-factor-GUF1-homolog,-mitochondrial-precursor-(EC-----  
>tr|A7LWQ3\_BACOV-Elongation-factor-4-(EC-3.6.5.n1)-(EF-4)-(Ribosomal-----  
>tr|A4BY39\_9FLAO-Elongation-factor-4-(EC-3.6.5.n1)-(EF-4)-(Ribosomal-----  
>tr|D9ZYU2\_9THEO-GTP-binding-protein-LepA-(Fragment)-[lepA]-[Thermoanaerobacter-----  
>tr|D9ZYU0\_9THEO-GTP-binding-protein-LepA-(Fragment)-[lepA]-[Thermoanaerobacter-----  
>tr|D4MXW6\_9FIRM-Elongation-factor-4-(EC-3.6.5.n1)-(EF-4)-(Ribosomal-----  
>tr|E5UYX0\_9BACE-Elongation-factor-4-(EC-3.6.5.n1)-(EF-4)-(Ribosomal-----  
>tr|G2LF38\_9BACT-Elongation-factor-4-(EC-3.6.5.n1)-(EF-4)-(Ribosomal-----  
>sp|A7HCF3|LEPA\_ANADF-Elongation-factor-4-(EC-3.6.5.n1)-(EF-4)-(Ribosomal-----  
>sp|B4UDQ7|LEPA\_ANASK-Elongation-factor-4-(EC-3.6.5.n1)-(EF-4)-(Ribosomal-----  
>sp|B8I3E6|LEPA\_CLOCE-Elongation-factor-4-(EC-3.6.5.n1)-(EF-4)-(Ribosomal-----  
>tr|D3R1J1\_CLOB3-Elongation-factor-4-(EC-3.6.5.n1)-(EF-4)-(Ribosomal-----  
>tr|F3A2I6\_9BACL-Elongation-factor-4-(EC-3.6.5.n1)-(EF-4)-(Ribosomal-----  
>tr|E4RV19\_LEAB4-Elongation-factor-4-(EC-3.6.5.n1)-(EF-4)-(Ribosomal-----  
>tr|F7V1F2\_EEGSY-Elongation-factor-4-(EC-3.6.5.n1)-(EF-4)-(Ribosomal-----  
>tr|C8WHM9\_EGGLE-Elongation-factor-4-(EC-3.6.5.n1)-(EF-4)-(Ribosomal-----

---VKLDILInGDLVDALSmIVHKDKAYEKARKIVEKLKEInIPRHlFEIPIQAAIGSKIIAREtVKALR  
---VKLDILInGELVDALSmIVHKDKAYEKARKIVEKLKEInIPRHlFEIPIQAAIGSKIIAREtVKALR  
---VKLDILInGELVDALSmIVHKDKAYEKARKIVEKLKEInIPRHlFEIPIQAAIGSKIIAREtVKALR  
---VKLDILInLELVDALSmIVHKDKAYEKARKIVEKSKEnIPRHlFEIPIQAAIGSKIIAREtVKALR  
---VKLDImIKGEVVDALsfIVHRDKAYQRARKIVEKLKEEIPRHlFEIPIQAcIGSKVIAREtVKALR  
---VkmDVLInGKLDALSwIVHRDfAERRGRLELVGRlKELIPRQmfEVAIQAAIGAKIIAREtVKALR  
---VKVDVLLnGntVDALSALLHKnAYDlGKkMcEKLKELIPRQqFDIPIQAAIGAKIIAREtVKALR  
---VRLDvMlnGEPVDALSAlVHRDKAYEWGRlLcEKLKELVPRQmfEIAIQAAIGtKVIAREtVKALR  
---VRLDvMlnGEPVDALSAlVHRDKAYEWGRlLcEKLKELVPRQmfEIAIQAAIGtKVIAREtVKALR  
---LLKLDILVnKEQVDALsfIVfADSAYDRGRKMcEKLKGEIPRQlFDIPIQAAVGSKVIAREtVKALR  
--LVKLDILInSEVVDALSmIVPKDRAYAKGRtmaEKLKEIIPRQlFEIPIQAAVGSKIIAREtVKALR  
--LVKLDILInDQSVDALSLIVHRDnAYARGRIVfEKLKDEIPRQqFAVPIQAAIGGKIIAREtVKALR  
--LVKLDILInEQnVDALSAlVHRDnAYARGRIVfEKLKDEIPRQqFAVPIQAAIGGKIIAREtVKALR  
--LVKLDILInGDKVDALSAlVHRDnAYARGRIVfEKLKDEIPRQqFAVPIQAAIGGKIIAREtVKALR  
--LVKLDILInGEIVDALSmIVHKDKAYERARKmtERLKEInIPRHlFEIPIQAAIGSKIIAREtVKALR  
--LVKLDILInGEVVDALSmIVHKDKAYEKGRKIVEKLKEInIPRHlFEIPIQAAIGSRRIAREtVKALR  
--LVKLDILInKEEVDALsfIVfEDSAERGRKMcEKLKEEIPRQlFEIPIQAAIGSKVIAREtVKALR  
--LVKLDILInKEmVDALsfIVfKESAYERGRKMcEKLKGEIPRHlFEIPIQAAVGGKIIAREtVKALR  
--LVKLDILInKEQVDALsfIVfKDSAYDRGRKMcEKLKEEIPRHlFEIPIQAAVGGKVIAREtVKALR  
--LVKLDILVGGEVVDALSSIVHKDRAYQRGRQlAEKLKELIPRHmfEPIQAAIGnKIIAREtVKALR  
--LVKLDILVnGEVVDALSmIVHKDKAYEKGRKIVEKLKEInIPRHlFEIPIQAAIGSRRIAREtVKALR  
--LVKLDImIKGEVVDALsfIVHKDKAYQRARRIVEKLKEEIPRHlFEIPIQAcIGSKVIAREtVKALR  
--LVKMDILiAGEPVDALSIIVHEDKAYRGRQlVEKLRELIIPRHlFEIPIQAAIGSRVIAREtVKALR  
--LVKVDLLnGnSVDALSLIHHADnAYDIGIKRlCIEKLKELIPRQqFDIPIQAAIGAKIIAREtVKALR  
--LVKVDVLLnAnIVDALSLIHHADnAYDIGIKRlCIEKLKELIPRQqFDIPIQAAIGAKIIAREtVKALR  
--LVKVDVLLnGntVDALSALLHKnAYDlGKkMcEKLKELIPRQqFDIPIQAAIGAKIIAREtVKALR  
--LVRLDVLInAQPVDALSAlIHHADnAHTIGKkMtEKLKELIPRQqFDIPIQAAIGAKIIAREtVKALR  
--LVRmnlInInGEAVDALSLIHRDKAYRGRDLVSKmKELIPRQmfEVIQAAIGAKVIAREtVKALR  
--LVRmnlInInGEVVDALSIIHRDKAYRGRDLVSKmKELIPRQmfEVAIQAAIGAKVIAREtVKALR  
--mVKLDILInGEIVDALSmIVHKDKAYGRARQlVtEKLKEIIPRHlFEVPIQAAIGKVIAREtVKALR  
---AKmDIVLnGEQVDALsfIVHKDRAYHRGRAIcEKLRELIIPRQmfEVPVQASVgtKVVAREtVKAmR  
---IKLDImLnGEKVDALSAlVHRDKAYDwGRlLcEKLKDLIPmQmfEIAVQAAIGQKIIAREtVKAmR  
---VKLDILInKEEVDALsfIIHADtAYERGRKMcEKLKEEIPRQlFEIPIQAAIGSKIIAREtVKAmR  
---VKLDILInKEEVDALsfIVHEDtAYERGRKMcEKLKEEIPRHmfEVAIQAAIGSKVIAREtVKAmR  
---VKLDILInGEKVDALSAlVHRDKAYDwGRlLcEKLRELIIPRQmfEIAIQAAIGAKIIAREtVKAmR  
---VKLDILInGEVVDALsfVHADKAYARARKIAEKLKDNIPRQlFEVPIQAAVGGKIIAREtVKAmR  
---VKLDImLnGEVVDALsfIVHADKAYARGRRIAEKLKDVIPRQlFEVPIQAAVGGRIAREtVKAmR  
---VkmDILnAEQVDALsfIVHKDRAYHRGRAIcEKLRELIIPRQmfEVPVQASVgtKVVAREtVKAmR  
---VkmDILnGEQVDALsfIVHKDRAYHRGRAIcEKLRELIIPRQmfEVPVQASVgtKVVAREtVKAmR  
---VkmDILnGEQVDALsfIVHRDRAYHRGRIIcEKLRELIIPRQmfEVPVQASIGtKVIAREtVKAmR  
---VkmDILnGEQVDALsfIVHRDRAYHRGRIIcEKLRELIIPRQmfEVPVQASIGtKVIAREtVKAmR  
---VkmDILnBVVDALSIVHRDRAYQRGKAVcEKLKDLIPRQmfEVPVQASIGSRVIAREtVKAmR  
---VkmDImLnGEQVDALsfIVHRDRAYnGRRIIcEKLRELIIPRQmfEVPVQAAIGQKIIAREtVKAmR  
---VkmDImLnBQVDALSIIVHRDRAYHRGRAIcEkmKELIPRQmfEVPVQASIGtKVIAREtVKAmR  
---VkmDImLnBQVDALSIIVHRDRAYQRGRVlCkMkELIPRQmfEVPVQASIGtKVIAREtVKAmR  
--LVKLDfLLnGDPVDALSmIVfRDnAYAKRRlCIEKLrDnIPRnLfEIPVQAAIGGKIIAREtVKAmR  
--LVKLDfLLnGDPVDALSmIVfRDnAYAKRRlCIEKLrDnIPRnLfEIPVQAAIGGKIIAREtVKAmR  
--LVKLDILInKEEVDALsfIIHKDtAYERGRKMcEKLKDEIPRHlFEIPIQAAIGGKVIAREtVKAmR  
--LVKLDILInKEEVDALsfIIHKDtAYERGRKMcEKLKEEIPRHlFEIPIQAAIGnKVIAREtVKAmR  
--LVKLDILInKEEVDALsfIVfEGSAYERGRKMcEKLKEEIPRQlFEIPIQAAVGSKIIAREtVKAmR  
--LVKLDILInKEEVDALsfIVfSSAYERGRKMcEKLKEEIPRQlFEIPIQAAVGSKIIAREtVKAmR  
--LVKLDILInKEEVDALsfIVHADtAYERGRKMcEKLKEEIPRHlFEIPIQAAIGSKVIAREtVKAmR  
--LVKLDILInKEEVDALsfIVHADtAYERGRKMcEKLKEEIPRHlFEIPIQAAVGSKIIAREtVKAmR  
--LVKLDILInKEEVDALsfIVHAETAYERGRKMcSKLKEEIPRHlFEIPIQAAVGSKIIAREtVKAmR  
--LVKLDILInKEEVDALsfIVHAETAYERGRMcEKLKEEIPRQlFEIPIQAAVGSKIIAREtVKAmR

>tr!D9TP81\_THETC-Elongation-factor-4-(EC-3.6.5.n1)-(EF-4)-(Ribosomal-----  
>tr!C9KWD8\_9BACE-Elongation-factor-4-(EC-3.6.5.n1)-(EF-4)-(Ribosomal-----  
>tr!B6J4K1\_COXB1-Elongation-factor-4-(EC-3.6.5.n1)-(EF-4)-(Ribosomal-----  
>tr!D9ZZ51\_9THEO-GTP-binding-protein-LepA-(Fragment)-[lepA]-[Thermoanaerobacter-----  
>sp!A4XKA0!LEPA\_CALS8-Elongation-factor-4-(EC-3.6.5.n1)-(EF-4)-(Ribosomal-----  
>tr!F9ZRF2\_AC1CS-Elongation-factor-4-(EC-3.6.5.n1)-(EF-4)-(Ribosomal-----  
>tr!A3XRE9\_LEEBM-Elongation-factor-4-(EC-3.6.5.n1)-(EF-4)-(Ribosomal-----  
>tr!G0J1D3\_CYCMS-Elongation-factor-4-(EC-3.6.5.n1)-(EF-4)-(Ribosomal-----  
>tr!B7DNC8\_9BACL-Elongation-factor-4-(EC-3.6.5.n1)-(EF-4)-(Ribosomal-----  
>tr!E4MIZ7\_9FIRM-Elongation-factor-4-(EC-3.6.5.n1)-(EF-4)-(Ribosomal-----  
>sp!Q97J6!LEPA\_CLOAB-Elongation-factor-4-(EC-3.6.5.n1)-(EF-4)-(Ribosomal-----  
>tr!C4YU23\_9RICK-Elongation-factor-4-(EC-3.6.5.n1)-(EF-4)-(Ribosomal-----  
>tr!A2HBG1\_ENTFC-Elongation-factor-4-(EC-3.6.5.n1)-(EF-4)-(Ribosomal-----  
>tr!A8PN34\_9COXI-Elongation-factor-4-(EC-3.6.5.n1)-(EF-4)-(Ribosomal-----  
>tr!F6BH01\_THEXL-Elongation-factor-4-(EC-3.6.5.n1)-(EF-4)-(Ribosomal-----  
>tr!B7R963\_9THEO-Elongation-factor-4-(EC-3.6.5.n1)-(EF-4)-(Ribosomal-----  
>tr!B7AQ05\_9FIRM-Elongation-factor-4-(EC-3.6.5.n1)-(EF-4)-(Ribosomal-----  
>sp!C4Z9E3!LEPA\_EUBR3-Elongation-factor-4-(EC-3.6.5.n1)-(EF-4)-(Ribosomal-----  
>tr!G2T2A2\_ROSHA-Elongation-factor-4-(EC-3.6.5.n1)-(EF-4)-(Ribosomal-----  
>tr!D5XA00\_THEPJ-Elongation-factor-4-(EC-3.6.5.n1)-(EF-4)-(Ribosomal-----  
>sp!Q8RB72!LEPA\_THETN-Elongation-factor-4-(EC-3.6.5.n1)-(EF-4)-(Ribosomal-----  
>sp!B9MJ25!LEPA\_ANATD-Elongation-factor-4-(EC-3.6.5.n1)-(EF-4)-(Ribosomal-----  
>sp!Q3AF13!LEPA\_CARHZ-Elongation-factor-4-(EC-3.6.5.n1)-(EF-4)-(Ribosomal-----  
>tr!Q1VRB5\_9FLAO-Elongation-factor-4-(EC-3.6.5.n1)-(EF-4)-(Ribosomal-----  
>tr!A9ZJ72\_COXBU-Elongation-factor-4-(EC-3.6.5.n1)-(EF-4)-(Ribosomal-----  
>tr!C7TD04\_LACRG-Elongation-factor-4-(EC-3.6.5.n1)-(EF-4)-(Ribosomal-----  
>tr!F6GFR3\_LACS5-Elongation-factor-4-(EC-3.6.5.n1)-(EF-4)-(Ribosomal-----  
>sp!P60789!LEPA\_GEOSL-Elongation-factor-4-(EC-3.6.5.n1)-(EF-4)-(Ribosomal-----  
>sp!Q39US7!LEPA\_GEOMG-Elongation-factor-4-(EC-3.6.5.n1)-(EF-4)-(Ribosomal-----  
>tr!F4LSH2\_TEPAE-Elongation-factor-4-(EC-3.6.5.n1)-(EF-4)-(Ribosomal-----  
>tr!E5YU74\_9BACL-Elongation-factor-4-(EC-3.6.5.n1)-(EF-4)-(Ribosomal-----  
>sp!Q11UD0!LEPA\_CYTH3-Elongation-factor-4-(EC-3.6.5.n1)-(EF-4)-(Ribosomal-----  
>tr!F7KN96\_9FIRM-Elongation-factor-4-(EC-3.6.5.n1)-(EF-4)-(Ribosomal-----  
>tr!F7YZ31\_BACCO-Elongation-factor-4-(EC-3.6.5.n1)-(EF-4)-(Ribosomal-----  
>tr!A1ZJ08\_9BACT-Elongation-factor-4-(EC-3.6.5.n1)-(EF-4)-(Ribosomal-----  
>tr!B0MPH0\_9FIRM-Elongation-factor-4-(EC-3.6.5.n1)-(EF-4)-(Ribosomal-----  
>tr!E6U8T6\_ETHHY-Elongation-factor-4-(EC-3.6.5.n1)-(EF-4)-(Ribosomal-----  
>tr!D3E4Y9\_GEOS4-Elongation-factor-4-(EC-3.6.5.n1)-(EF-4)-(Ribosomal-----  
>tr!G4HE00\_9BACL-Elongation-factor-4-(EC-3.6.5.n1)-(EF-4)-(Ribosomal-----  
>tr!C7ITD2\_THEET-Elongation-factor-4-(EC-3.6.5.n1)-(EF-4)-(Ribosomal-----  
>sp!Q2IIA6!LEPA\_ANADE-Elongation-factor-4-(EC-3.6.5.n1)-(EF-4)-(Ribosomal-----  
>tr!G4EB24\_9BACL-Elongation-factor-4-(EC-3.6.5.n1)-(EF-4)-(Ribosomal-----  
>tr!D1YR41\_9FIRM-Elongation-factor-4-(EC-3.6.5.n1)-(EF-4)-(Ribosomal-----  
>tr!F3M622\_9BACL-Elongation-factor-4-(EC-3.6.5.n1)-(EF-4)-(Ribosomal-----  
>tr!C6CTR7\_PAESJ-Elongation-factor-4-(EC-3.6.5.n1)-(EF-4)-(Ribosomal-----  
>tr!E2ZPF7\_9FIRM-Elongation-factor-4-(EC-3.6.5.n1)-(EF-4)-(Ribosomal-----  
>tr!C7H2W3\_9FIRM-Elongation-factor-4-(EC-3.6.5.n1)-(EF-4)-(Ribosomal-----  
>tr!D9ZZB5\_9THEO-GTP-binding-protein-LepA-(Fragment)-[lepA]-[Thermoanaerobacter-----  
>tr!D0TP94\_9BACE-Elongation-factor-4-(EC-3.6.5.n1)-(EF-4)-(Ribosomal-----  
>tr!B9ZY03\_UREUR-Elongation-factor-4-(EC-3.6.5.n1)-(EF-4)-(Ribosomal-----  
>tr!G4NXA9\_BACPN-Elongation-factor-4-(EC-3.6.5.n1)-(EF-4)-(Ribosomal-----  
>tr!E0RI56\_PAEP6-Elongation-factor-4-(EC-3.6.5.n1)-(EF-4)-(Ribosomal-----  
>tr!F3B787\_9FIRM-Elongation-factor-4-(EC-3.6.5.n1)-(EF-4)-(Ribosomal-----  
>tr!E5VSW0\_9FIRM-Elongation-factor-4-(EC-3.6.5.n1)-(EF-4)-(Ribosomal-----  
>tr!C0BVT8\_9CLOT-Elongation-factor-4-(EC-3.6.5.n1)-(EF-4)-(Ribosomal-----

--LVKLDILInKEEVDALSfIVHGESAYERGRMcEKLKDEIPRHLfEIPiQAAVGSKVIAREtVKAmR  
--LVKLDILInKEEVDALSfIVHGStAYERGRMcEKLKEEIPRQLfEIPiQAAVGSKIIAREtVKAmR  
--LVKLDILInKEEVDALSfIVHSGtAYERGRMcEKLKEEIPRQLfEIPiQAAIGSKVIAREtVKAmR  
--LVKLDILInKEQVDALSfIVfKDSAYDRGRMcERLKEEIPRHLfEIPiQAAVGGKVIAREtVKAmR  
--LVKLDILInKEQVDALSfIVfKDSAYERGRMcEKLKEEIPRHLfEIPiQAAVGGKVIAREtVKAmR  
--LVKLDILInREEVdALSfIVfKGSAYDRGRMcEKLKEEIPRHLfEIPiQAAVGGKVIAREtVKAmR  
--LVKLDILInREEVdALSfIVHRDSAYERGRMcEKLKDEIPRHLfEIPiQAAVGGKIIAREtVKAmR  
--LVKLDILInREEVdALSfIVHSAtAYERGRMcEKLKQEIIPRQLfEIPiQAAIGSKIIAREtVKAmR  
--LVKLDILInGDIVDALSmIVPPEERAYHKRGIAEKLKEIIPRQLfEIPiQAAVGSKIIAREtVKAmR  
--LVKLDILInGDIVDALSmIVPKERAYARGRGIAEKLKEIIPRQmfEVPiQAAVGSKVIAREtVKAmR  
--LVKLDILInGDIVDALSmIVPEVKAYQRGIAEKLKEIIPRHLfEVPiQAAVGSKIIAREtVKAmR  
--LVKLDILInGDIVDALSLIVHADSAAYARGRLAaKREIIPRQmfEVAIQAAIGnKIIAREtVKAmR  
--LVKLDILInGDIVDALSmIVPDERAYHKRGIAEKLKEIIPRQmfEVPiQAAIGSKIIAREtVKAmR  
--LVKLDILInGDIVDALSmIVPDERAYSKRGIAEKLKEIIPRQmfEVPiQAAIGSKIIAREtVKAmR  
--LVKLDILInGDIVDALSmIVPEERAYHKRGIAEKLKEIIPRQLfEIPiQAAVGSKIIAREtVKAmR  
--LVKLDILInGDIVDALSmIVHDtAYDRGRMcEKLKEEIPRQLfEIPiQAAVGSKIIAREtVKAmR  
--LVKLDILInGDIVDALSmIVHtDKAYPRARRIAEKLKEQIPRQLfEVPiQAAVGGKIIAREtVKAmR  
--LVKLDILInGDIVDALSmIVPEERAYERGRGIAEKLKEIIPRQLfEIPiQAAIGGKIIAREtVKAmR  
--LVKLDILInHEEVdALSfIVHAGtAYERGRMcEKLKEEIPRQLfEIPiQAAIGSKIIAREtVKAmR  
--LVKLDILInKEEVDALSfIVfAGSAYERGRMcEKLKEEIPRQLfEIPiQAAVGSKIIAREtVKAmR  
--LVKLDILInKEEVDALSfIVHADtAYDRGRMcEKLKEEIPRQLfEIPiQAAVGSKIIAREtVKAmR  
--LVKLDILInKEEVDALSfIVHAESAYDRGRMcEKLKEEIPRQLfEIPiQAAVGGKIIAREtVKAmR  
--LVKLDILInKEEVDALSfIVHALSAYDRGRMcEKLKDEIPRQLfEIPiQAAIGGKIIAREtVKAmR  
--LVKLDILInGDIVDALSmIVPREKAYEKGRGIAEKLKEIIPRQmfEVPiQAAVGSKIIAREtVKAmR  
--LVKLDILInGDIVDALSmIVPEERAYHKRGIAEKLKEIIPRQmfEIPiQAAVGAkIIAREtVKAmR  
--LVKLDILInGDIVDALSmIVPEERAYnKGRAIAEKLKEIIPRQmfEIPiQAAVGAkIIAREtVKAmR  
--LVKLDILInGDIVDALSmIVPEESAYnKGRAIAEKLKEIIPRQmfEIPiQAAVGAkIIAREtVKAmR  
--LVKMDILInGDIVDALScIVHSERAYtRGRALVEKLRLSIPRQmfEIPVQAAIGnKIIAREtVKAmR  
--LVKVDILInGDIVDALSLfIAHKDKAYGRARKIcEKLKEIIPRQLfEVPiQAAIGGKIIAREtVKAmR  
--LVKVDILInGDIVDALSLfIAHRDKAYPRARRIcEKLKDEIPRQLfEIPiQAAIGGRVIAREtVKAmR  
--LVRLDILInGDIVDALSmIVfSDnAYAKGRRIcEKLKEIPRALfEIPiQAAVGSKIIAREtVKAmR  
--LVRLInImInGEVVDALSLIIHKDKAYYRGRELVSkmKELIPRQmfEIAIQAAVgtKVIAREtVKAmR  
--LVRMdVmInGEVVDALStVVRDRAYHRGRALVEKLKDLIPRQLfEVPiQAAIGGRVIAREtVKAmR  
--LVRMmVmInGEVVDALSLILHRDKAYYRGRLDVSkmKELIPRQmfEVAIQAAIGnKIIAREtVKAmR  
--mIKLDVmlnGDGVDALSIVHRTKAYEwGKLLcEKLRELIPRQmfEIAIQAAIGQKIIAREtVKAmR  
--mVKLDVmlnGEAVDALSAIVHRSKSYEWgKLLcEKLRELIPRQmfEIAIQAAIGQKIIAREtVKAmR  
---VKLDILInREEVdALSfIVHADSAAYDRGRMcERLKEEIPRHLfEIPiQAAIGGKIIAREtVKAVR  
---VKLDILInREEVdALSfIVHADSAAYERGRMcEKLKDEIPRHLfEIPiQAAIGGKIIAREtVKAVR  
---VKLDILInREEVdALSfIVHADSAAYERGRMcERLKEEIPRHLfEIPiQAAIGGKIIAREtVKAVR  
---LAKLDILInGEPVDALSSLIYADHAYdfGRMcEKLKELIPRQFDIAIQAAIGAKIIAREtVKAVR  
---LAKLDILInGEPVDALSSLIYHEHAYdfGRMcEKLKELIPRQFDIAIQAAIGAKIIAREtVKAVR  
---LQKLDILInKEEVDALSfIVHADSAAYERGRMcEKLKDEIPRHLfEIPiQAAIGGKVIAREtVKAVR  
---LVKLDILInREtVDALSfIVHSStAYERARKIcEKLKEEIPRHLfEIPiQAAIGSKIIAREtVKAVR  
---LVKLDILInGEPVDALSSLIYtDHAYdfGRMcEKLKELIPRQFDIAIQAAIGAKIIAREtVKAVR  
---LVKLDILInGEPVDALSSLIYtDHAYdfGRMcEKLKELIPRQFDIAIQAAVGAkIIAREtVKAVR  
---LVKLDILInGEPVDALStLHfDnSVPfGRMcEKLKELIPRQFDIAIQAAIGAKIIAREtVKAVR  
---LVKLDILInGAVDALSmIVPQEKAYQRGKAIvDKLktIIPRQLfEIPiQAAIGAKIIAREtVKAVR  
---LVKLDILInGnPVdALSfIVHKSAYQRGKAIvDKLktIIPRQLfEIPiQAAIGAKIIAREtVKAVR  
---LVKLDILInGnPVdALSfIVHKSAYQRGKAIvDKLktIIPRQLfEIPiQAAIGAKIIAREtVKAVR  
---LVKLDILInGnPVdALSfIVHKSAYDRGRMcEKLKDEIPRHLfEIPiQAAIGGKIIAREtVKAVR  
---VkmDILInGDPVDALSIIVHKDRAAARGRALAEKLKELIPRQmfEIPiQAAVgtKIVAREtVKAwR  
---VkmDILInGDPVDALSIIVHKDRAAARGRALAEKLKELIPRQmfEIPiQAAVgtKIVAREtVKAwR  
---VkmDILInGDPVDALSIIVHKDRAAARGRALAEKLKELIPRQmfEIPiQAAVgtKIVAREtVKAwR  
---VkmDILInGDPVDALSIIVHKDRAAARGRALAEKLKELIPRQmfEIPiQAAVgtKIVAREtVKAwR  
---VkmDILInGYPVDALSIIVHKDRAAARGRALAEKLKELIPRQmfEIPiQAAVgtKIVAREtVKAwR  
---LkMDILInGnIVEElvTVHREKAYtVgKSIcERLKDSLPRQLfEIAVQAAIGSKVIAREtVKAYR  
---LVKLDILInGDIVDALSmIVHSEKAYSRRRIAEKLKDtIHKQOFEIPiQACIGGKIIAREtVKAYR

>tr!A4EC61\_9ACTN-Elongation-factor-4-(EC-3.6.5.n1)-(EF-4)-(Ribosomal-----  
>tr!F0YXR0\_9CLOT-Elongation-factor-4-(EC-3.6.5.n1)-(EF-4)-(Ribosomal-----  
>tr!G2RY08\_BACME-Elongation-factor-4-(EC-3.6.5.n1)-(EF-4)-(Ribosomal-----  
>tr!C0FZB7\_9FIRM-Elongation-factor-4-(EC-3.6.5.n1)-(EF-4)-(Ribosomal-----  
>tr!D6LGN9\_9FUSO-Elongation-factor-4-(EC-3.6.5.n1)-(EF-4)-(Ribosomal-----  
>tr!F7V5V0\_CLOSS-Elongation-factor-4-(EC-3.6.5.n1)-(EF-4)-(Ribosomal-----  
>tr!F7KB10\_9FIRM-Elongation-factor-4-(EC-3.6.5.n1)-(EF-4)-(Ribosomal-----  
>tr!F7JJK0\_9FIRM-Elongation-factor-4-(EC-3.6.5.n1)-(EF-4)-(Ribosomal-----  
>tr!A1VFR1\_DESVV-Elongation-factor-4-(EC-3.6.5.n1)-(EF-4)-(Ribosomal-----  
>tr!F0KCN9\_CLOAE-Elongation-factor-4-(EC-3.6.5.n1)-(EF-4)-(Ribosomal-----  
>sp!B5EB36!LEPA\_GEOBB-Elongation-factor-4-(EC-3.6.5.n1)-(EF-4)-(Ribosomal-----  
>tr!E6W3R4\_DESIS-Elongation-factor-4-(EC-3.6.5.n1)-(EF-4)-(Ribosomal-----  
>tr!C4IDG6\_CLOBU-Elongation-factor-4-(EC-3.6.5.n1)-(EF-4)-(Ribosomal-----  
>tr!B2V211\_CLOBU-Elongation-factor-4-(EC-3.6.5.n1)-(EF-4)-(Ribosomal-----  
>tr!A6LRM9\_CLOB8-Elongation-factor-4-(EC-3.6.5.n1)-(EF-4)-(Ribosomal-----  
>tr!D4KA13\_9FIRM-Elongation-factor-4-(EC-3.6.5.n1)-(EF-4)-(Ribosomal-----  
>tr!D8GP16\_CLOLD-Elongation-factor-4-(EC-3.6.5.n1)-(EF-4)-(Ribosomal-----  
>tr!D9YA70\_9DELt-Elongation-factor-4-(EC-3.6.5.n1)-(EF-4)-(Ribosomal-----  
>tr!F3PAF1\_9ACTO-Elongation-factor-4-(EC-3.6.5.n1)-(EF-4)-(Ribosomal-----  
>tr!C0CK36\_9FIRM-Elongation-factor-4-(EC-3.6.5.n1)-(EF-4)-(Ribosomal-----  
>tr!D3ATC5\_9CLOT-GTP-binding-protein-LepA-[CLOSTHATH\_06884]-[Clostridium-hathewayi-  
>tr!D9R661\_CLOSW-Elongation-factor-4-(EC-3.6.5.n1)-(EF-4)-(Ribosomal-----  
>tr!C1I2F2\_9CLOT-Elongation-factor-4-(EC-3.6.5.n1)-(EF-4)-(Ribosomal-----  
>tr!B1V754\_CLOPE-Elongation-factor-4-(EC-3.6.5.n1)-(EF-4)-(Ribosomal-----  
>sp!A0Q1R8!LEPA\_CLONN-Elongation-factor-4-(EC-3.6.5.n1)-(EF-4)-(Ribosomal-----  
>tr!F9ENE2\_FUSNU-GTP-binding-protein-LepA-[lepA]-[Fusobacterium-nucleatum-subsp.-  
>sp!A4J7F8!LEPA\_DESRM-Elongation-factor-4-(EC-3.6.5.n1)-(EF-4)-(Ribosomal-----  
>tr!F4XFE0\_9FIRM-Elongation-factor-4-(EC-3.6.5.n1)-(EF-4)-(Ribosomal-----  
>tr!G4L215\_9FIRM-Elongation-factor-4-(EC-3.6.5.n1)-(EF-4)-(Ribosomal-----  
>tr!D7ITC1\_9BACE-Elongation-factor-4-(EC-3.6.5.n1)-(EF-4)-(Ribosomal-----  
>sp!C6DZ67!LEPA\_GEOSM-Elongation-factor-4-(EC-3.6.5.n1)-(EF-4)-(Ribosomal-----  
>tr!F8I910\_SULAT-Elongation-factor-4-(EC-3.6.5.n1)-(EF-4)-(Ribosomal-----  
>sp!A1ARG8!LEPA\_PELPD-Elongation-factor-4-(EC-3.6.5.n1)-(EF-4)-(Ribosomal-----  
>sp!Q5LC85!LEPA\_BACFN-Elongation-factor-4-(EC-3.6.5.n1)-(EF-4)-(Ribosomal-----  
>tr!C6VWS2\_DYAFD-Elongation-factor-4-(EC-3.6.5.n1)-(EF-4)-(Ribosomal-----  
>tr!G5HSF9\_9CLOT-GTP-binding-protein-lepA-[HMPREF9469\_05521]-[Clostridium-citroniae-  
>tr!G5I7B1\_9CLOT-GTP-binding-protein-lepA-[HMPREF9467\_04644]-[Clostridium-  
>tr!C5EQB4\_9FIRM-Elongation-factor-4-(EC-3.6.5.n1)-(EF-4)-(Ribosomal-----  
>tr!B5BNC6\_UREUR-Elongation-factor-4-(EC-3.6.5.n1)-(EF-4)-(Ribosomal-----  
>tr!A9WGU4\_CHLAA-Elongation-factor-4-(EC-3.6.5.n1)-(EF-4)-(Ribosomal-----  
>tr!G5GHA8\_9FIRM-GTP-binding-protein-lepA-[HMPREF9333\_00948]-[Johnsonella-ignava-  
>tr!E5BFW7\_9FUSO-GTP-binding-protein-lepA-[FSBG\_00495]-[Fusobacterium-sp.-3\_1\_5R]-----  
>tr!E4MF29\_9BACT-Elongation-factor-4-(EC-3.6.5.n1)-(EF-4)-(Ribosomal-----  
>tr!D6LC01\_9FUSO-Elongation-factor-4-(EC-3.6.5.n1)-(EF-4)-(Ribosomal-----  
>tr!F4KL35\_PORAD-Elongation-factor-4-(EC-3.6.5.n1)-(EF-4)-(Ribosomal-----  
>tr!G2IDY7\_9CLOT-Elongation-factor-4-(EC-3.6.5.n1)-(EF-4)-(Ribosomal-----  
>tr!F9VKQ0\_ARTSS-Elongation-factor-4-(EC-3.6.5.n1)-(EF-4)-(Ribosomal-----  
>tr!C0CYZ5\_9CLOT-Elongation-factor-4-(EC-3.6.5.n1)-(EF-4)-(Ribosomal-----  
>tr!E4LCW2\_9FIRM-Elongation-factor-4-(EC-3.6.5.n1)-(EF-4)-(Ribosomal-----  
>tr!F5KYH0\_9FIRM-Elongation-factor-4-(EC-3.6.5.n1)-(EF-4)-(Ribosomal-----  
>tr!F9N379\_9FIRM-Elongation-factor-4-(EC-3.6.5.n1)-(EF-4)-(Ribosomal-----  
>tr!E1WPK5\_BACF6-Elongation-factor-4-(EC-3.6.5.n1)-(EF-4)-(Ribosomal-----  
>tr!D1BMF1\_VEIPT-Elongation-factor-4-(EC-3.6.5.n1)-(EF-4)-(Ribosomal-----  
>tr!F7A0N4\_MONDO-Uncharacterized-protein-(Fragment)-[GUF1]-[Monodelphis-domestica-  
>tr!E1K961\_9FIRM-Elongation-factor-4-(EC-3.6.5.n1)-(EF-4)-(Ribosomal-----



--LVKLDILVnKEEVDALsfIVHADtAYERGRKmcEKLKEEIPRQLfEPIQAAIGGKIIAREtVRAmR  
--LVKLDILVnKEEVDALsfIVHADtAYERGRKmcEKLKEEIPRQLfEPIQAAIGGKIIAREtVRAmR  
--LVKMDILInRESVDALsfIIVKEGAYERAKKmcEKLKnEIPRQLfEVPVQAAIGGKIIAREtVRAmR  
--LVKVDmLVnGDQVDALsfIAHKDKAYGRARRLcEKLKDNIPRQLfEVPVQAAIGGKIIAREtVRAmR  
--LVKLDILInKEEVDALsfILHQDtAYERGRKmcEKLKQEIPIRHlfEPIQAAIGnKVIAREtVRAVR  
--LVKVEVLVAGDPVDSLsIIVHRDKAYQRGRALVEKLKELIPRQOfEVPVQAAVGRVVIAREtVRAVR  
--LVKLDVLLnGETIDALsfItHKDKAYHRGRQLVEKmkELIPKQmfEVAIQAAIGKRVVIAREtVSA  
--LVRLDILLnGEPVDALAVIHRDKAYtYGRSLALKLKRRtIPRQLfQVAIQAAIGQKIIAREtVSAfr  
--LVRLDILLnSEPVDALAVIHRDRAYtYGRSLALKLKRRtIPRQLfQVAIQAAIGQKIIAREtVSAfr  
--LVRLDImLnSEPVDALAVIHRDRAYtYGRSLALKLKRRtIPRQLfQVAIQAAIGQKIIAREtVSAfr  
--LVKLDILLnGEVVDALStIVHRDKAYARGRAIAEKLKKEVIPRQLfEPIQAAIGQKIIAREtVSAfr  
--LVRLDILVnGEAVDALSSItHRDKAARRGRDmcARLKEALPRQLfEVAVQAAVSGKVVAREtVSAfr  
---VKmDILLnGDAVDALSIITHKDFaQrGRALVSKmRELIPRQmfEVAIQAAIGSKVIAREtVtAIR  
--LVKLDILLnGQAVDAmAtIVHnKSYRVRGRELVEKLKKEVIPRQmfEPIQAAIGSKVIAREtVtAmR  
---LQKMDILLnGEIVDALSLIVHHDfAYERGKAIEKLKKEIPRQmfEPIQAAIGGKIIAREtVtAmR  
--LVKMDILLnGDIVDALsfIfPKEKAItrGRVtIcKKLKEtIPRQmfEPIQAAIGnKVIARQtLSALR  
---VKVDVLLnGDRVDALAIcHSDHAYGRGRALIEKmkDLIPRQmfDVAIQAAIGAHIIARQtVKALR  
--LVKMDILLnSERVDALAVIHRDSAHSRGKLIAEKmQQLIPRQmfDVAIQAAIGSHIIARQtVKALR  
--LVKMDILLnSERVDALSVIHRSSHSRGGKIIAEKmkDLIPRQmfDVAIQAAIGSHIIARQtVKALR  
--LVKMDILLnSERVDALSVIHRSSAHSRGKLIAEKmKDLIPRQmfDVAIQAAIGSHIIARQtVKALR  
--LVRVDVLLnGDKVDALAmIcHLDQsAYRGRALcEKmKELVPRQmfDVAIQAAIGGKIIARQtVKALR  
---QKLDILLSGKPIDALsfIVHKDKAYDRGRVlcEKLKDIIPRQLfEVPVQAAVGGRIARQtVRAKR  
---QKLDILLSGKPIDALsfIVHKDKAYDRGRVlcEKLKELIPRQLfEVPVQAAVGGRIARQtVRAKR  
--LVKMDILLnAEKVDALsfIVHRDFAYERGKAIVEKLKLLIPRQOfEVPVQAAIGQKIVARSDIKALR  
--LVKMDILLnGDKVDALsfIVHKEfAYERGKIIIVEKLKLLIPRQOfEVPVQAAIGQKIVARSDIKALR  
--LVKMDILLnGDKVDALsfIVHKEfAYERGKIIIVEKLKLLIPRQOfEVPVQAAIGQKIVARSDIKALR  
--LVKMDILLnGDKVDALsfIVHRDFAYERGKAIVEKLKLLIPRQOfEVPVQAAIGQKIVARSDIKALR  
---VKMDILLnGKVDALsfIVHRDFAYERGKtIIVERLKElIPRQOfEVPVQAAVGGKIIARStIKALR  
---VKMDILLnGdtIDALsfVHRDFAYERGKQIVEKLKELIPRQOfEVPVQAAIGnKVIARStIKAVR  
--LVKLDILInGKPVDAISVIVHESKAYQRGRQLVDKLKEIIPRQLfEVAIQAAIGnKIIARStIKALR  
---VKVDVLLnGERVDAISIIthRDQAQRGRELteRmSLLIPRQmfEVAIQAAIGSKIIARStIKAmR  
--LVKMDILLnAEKVDALsfIVHKEfAYERGKVIIVEKLKELIPRQOfEVPVQAAIGQKIVARStIKAIR  
--LVKMDILLnGKVDALSVIHRDSAYERGKVIIVEKLKELIPRQOfEVPVQASIGtKIIARStIKAIR  
--LVKMDILLnGKVDALsfIVHRDFAYDRGKIIIVEKLKELIPRQOfEVPVQAAIGQKIVARStIKAIR  
--LVKMDILLnGKVDALsfIVHRDSAYDRGKIIIVEKLKELIPRQOfEVPVQAAIGQKIVARStIKAIR  
---VKLDILVnGEPVDALStIVHRDLAQVRGRELteRLKSIIPRQmfEVAIQAAVGSRIARStIKALR  
---VKMDILLnGEIVDALStIVHRDFafnRGAItEKLRLtIPRQOfEVPVQAAInQVIARStIKALR  
---VKMDILLnGKIDALsfIVHRDSAYERGKAIVEKLKDLIPRQOfEVPVQAAIGnKVIARStIKALR  
---VKMDILLnGKIDALsfIVHRDSAYERGKVIIVEKLKDLIPRQOfEVPVQAAIGnKIIARStIKALR  
--LVKMDILLnGEIVDALSLIVHHDfAYERGKVIIVEKLKDLIPRQOfEVPVQAAIGGKIIARStIKALR  
--LVKMDILLnGKIDALsfIVHRDSAYERGKVIIVEKLKDLIPRQOfEVPVQAAIGnKIIARStIKALR  
--LVKMDILLnGKVDALsfIVHRDSAYDRGKVIIVEKLKDLIPRQOfEVPVQAAIGnKIIARStIKALR  
---VKMDILLnAEQIDALSVIHRDSAYQRGKAIVEKLKELIPRQOfEVPVQASIGQKIIARStIKAmR  
---VKMDILLnGESIDALSVIHRDSAYERGKIIIVEKLKELIPRQOfEVPVQASIGtKIIARStIKAmR  
---VKMDILLnGKVDALSVIHRDSAYERGKVIIVEKLKDLIPRQOfEVPVQAAIGtKIIARStIKAmR  
---VKMDImLnGKIDALsfIVHRDYAYERGKIIIVEKLKELIPRQhfEVPVQAAIGQKIVARStIKAmR  
--LVKMDILLnAEKVDALsfIVHRDFAYERGKVIIVEKLKDLIPRQOfEVPVQAAIGQKIVARStIKAmR  
--LVKMDILLnGKVDALSVIHRDSAYDRGKIIIVEKLKELIPRQOfEVPVQASIGQKVIARStIKAmR  
--LVKMDILLnGKVDALsfIVHRDSAYDRGKVIIVEKLKELIPRQOfEVPVQAAIGnKVIARStIKAmR  
--LVKMDILLnGQVDALsfIVHRDSAYDRGKVIIVEKLKELIPRQOfEVPVQAAIGnKVIARStIKAmR  
--LVKMDILLnGQVDALSVIHRDSAYERGKVIIVEKLKDLIPRQOfEVPVQAAIGnKVIARStIKAmR  
--LVKMDImLnGKIDALsfIVHRDYAYERGKVIIVEKLKELIPRQhfEVPVQAAIGQKIVARStIKAmR  
--LVKMDImLnGKIDALsfIVHRDYAYERGKVIIVEKLKELIPRQOfEVPVQAAIGtKVIARStIKAmR  
--LVKIDILLnGDKVDALsfIVHRDFaQERSRVItKKLKEIIPRRnfEIPVQAAIGSKIVARStIKAYR

>tr!C9RUX1\_GEOSY-Elongation-factor-4-(EC-3.6.5.n1)-(EF-4)-(Ribosomal-----  
>tr!D4LUT6\_9FIRM-Elongation-factor-4-(EC-3.6.5.n1)-(EF-4)-(Ribosomal-----  
>tr!C4G6T8\_ABIDE-Elongation-factor-4-(EC-3.6.5.n1)-(EF-4)-(Ribosomal-----  
>tr!A6NQH2\_9FIRM-Elongation-factor-4-(EC-3.6.5.n1)-(EF-4)-(Ribosomal-----  
>tr!B0MCH4\_9FIRM-Elongation-factor-4-(EC-3.6.5.n1)-(EF-4)-(Ribosomal-----  
>sp!Q31R08!LEPA\_SYNE7-Elongation-factor-4-(EC-3.6.5.n1)-(EF-4)-(Ribosomal-----  
>tr!D2MJL6\_9BACT-Elongation-factor-4-(EC-3.6.5.n1)-(EF-4)-(Ribosomal-----  
>tr!G1UUG4\_9DELTA-Elongation-factor-4-(EC-3.6.5.n1)-(EF-4)-(Ribosomal-----  
>tr!B6WV93\_9DELTA-Elongation-factor-4-(EC-3.6.5.n1)-(EF-4)-(Ribosomal-----  
>sp!B8J444!LEPA\_DESDA-Elongation-factor-4-(EC-3.6.5.n1)-(EF-4)-(Ribosomal-----  
>tr!F4A0N3\_MAHAA5-Elongation-factor-4-(EC-3.6.5.n1)-(EF-4)-(Ribosomal-----  
>tr!C5NVE3\_9BACL-Elongation-factor-4-(EC-3.6.5.n1)-(EF-4)-(Ribosomal-----  
>tr!E8WZU4\_ACISM-Elongation-factor-4-(EC-3.6.5.n1)-(EF-4)-(Ribosomal-----  
>tr!G7KZV0\_MEDTR-GTP-binding-protein-lepA-[MTR\_7g009740]-[Medicago-truncatula-----  
>sp!P60792!LEPA\_ONYPE-Elongation-factor-4-(EC-3.6.5.n1)-(EF-4)-(Ribosomal-----  
>tr!G0DWT5\_PROAA-Elongation-factor-4-(EC-3.6.5.n1)-(EF-4)-(Ribosomal-----  
>tr!E5V310\_9BACL-Elongation-factor-4-(EC-3.6.5.n1)-(EF-4)-(Ribosomal-----  
>tr!B0G870\_9FIRM-Elongation-factor-4-(EC-3.6.5.n1)-(EF-4)-(Ribosomal-----  
>tr!C6N726\_9GAMM-Elongation-factor-4-(EC-3.6.5.n1)-(EF-4)-(Ribosomal-----  
>tr!D3HRV6\_LEGLN-Elongation-factor-4-(EC-3.6.5.n1)-(EF-4)-(Ribosomal-----  
>sp!Q0VP16!LEPA\_ALCBS-Elongation-factor-4-(EC-3.6.5.n1)-(EF-4)-(Ribosomal-----  
>tr!D5N5V2\_BACPN-Elongation-factor-4-(EC-3.6.5.n1)-(EF-4)-(Ribosomal-----  
>tr!C7QM89\_CYAP0-GTP-binding-protein-LepA-[Cyan8802\_3577]-[Cyanotheca-sp.-(strain-----  
>tr!G5IST8\_9ENTE-GTP-binding-protein-lepA-[HMPREF9478\_01382]-[Enterococcus-----  
>sp!B5XLC6!LEPA\_STRPZ-Elongation-factor-4-(EC-3.6.5.n1)-(EF-4)-(Ribosomal-----  
>tr!G6GMK4\_9CHRO-GTP-binding-protein-LepA-[Cy51472DRAFT\_0217]-[Cyanotheca-sp.-ATCC-----  
>tr!Q3XZE8\_ENTFC-Elongation-factor-4-(EC-3.6.5.n1)-(EF-4)-(Ribosomal-----  
>tr!G4P381\_BACSU-Elongation-factor-4-(EC-3.6.5.n1)-(EF-4)-(Ribosomal-----  
>sp!Q8CXD0!LEPA\_OCEIH-Elongation-factor-4-(EC-3.6.5.n1)-(EF-4)-(Ribosomal-----  
>tr!F0S0H4\_DESTD-Elongation-factor-4-(EC-3.6.5.n1)-(EF-4)-(Ribosomal-----  
>tr!G4E7N0\_9GAMM-Elongation-factor-4-(EC-3.6.5.n1)-(EF-4)-(Ribosomal-----  
>tr!F3IF16\_PSESL-Elongation-factor-4-(EC-3.6.5.n1)-(EF-4)-(Ribosomal-----  
>sp!Q5WHG5!LEPA\_BACSK-Elongation-factor-4-(EC-3.6.5.n1)-(EF-4)-(Ribosomal-----  
>tr!A6CQZ3\_9BACI-Elongation-factor-4-(EC-3.6.5.n1)-(EF-4)-(Ribosomal-----  
>tr!C5AX80\_METEA-Elongation-factor-4-(EC-3.6.5.n1)-(EF-4)-(Ribosomal-----  
>tr!D5TEC4\_LEGP2-Elongation-factor-4-(EC-3.6.5.n1)-(EF-4)-(Ribosomal-----  
>tr!A4BRZ1\_9GAMM-Elongation-factor-4-(EC-3.6.5.n1)-(EF-4)-(Ribosomal-----  
>tr!F5WS09\_ERYRF-Elongation-factor-4-(EC-3.6.5.n1)-(EF-4)-(Ribosomal-----  
>sp!Q5KWZ3!LEPA\_GEOKA-Elongation-factor-4-(EC-3.6.5.n1)-(EF-4)-(Ribosomal-----  
>sp!A5CE57!LEPA\_ORITB-Elongation-factor-4-(EC-3.6.5.n1)-(EF-4)-(Ribosomal-----  
>tr!F0HI22\_9FIRM-Elongation-factor-4-(EC-3.6.5.n1)-(EF-4)-(Ribosomal-----  
>tr!D5DMP7\_BACMD-Elongation-factor-4-(EC-3.6.5.n1)-(EF-4)-(Ribosomal-----  
>sp!B7GKC4!LEPA\_ANOFW-Elongation-factor-4-(EC-3.6.5.n1)-(EF-4)-(Ribosomal-----  
>tr!E6TW24\_BACCJ-Elongation-factor-4-(EC-3.6.5.n1)-(EF-4)-(Ribosomal-----  
>tr!E1PSF3\_MYCFJ-Elongation-factor-4-(EC-3.6.5.n1)-(EF-4)-(Ribosomal-----  
>sp!Q8XIS6!LEPA\_CLOPE-Elongation-factor-4-(EC-3.6.5.n1)-(EF-4)-(Ribosomal-----  
>tr!C9LCK5\_RUMHA-Elongation-factor-4-(EC-3.6.5.n1)-(EF-4)-(Ribosomal-----  
>tr!Q2B0M1\_9BACI-Elongation-factor-4-(EC-3.6.5.n1)-(EF-4)-(Ribosomal-----  
>tr!D3FXK6\_BACPE-Elongation-factor-4-(EC-3.6.5.n1)-(EF-4)-(Ribosomal-----  
>sp!A7GT14!LEPA\_BACCN-Elongation-factor-4-(EC-3.6.5.n1)-(EF-4)-(Ribosomal-----  
>tr!Q4MJK6\_BACCE-Elongation-factor-4-(EC-3.6.5.n1)-(EF-4)-(Ribosomal-----  
>tr!E3DZ86\_BACA1-Elongation-factor-4-(EC-3.6.5.n1)-(EF-4)-(Ribosomal-----  
>sp!P37949!LEPA\_BACSU-Elongation-factor-4-(EC-3.6.5.n1)-(EF-4)-(Ribosomal-----  
>sp!Q65H50!LEPA\_BACLD-Elongation-factor-4-(EC-3.6.5.n1)-(EF-4)-(Ribosomal-----  
>tr!C6NRW6\_9GAMM-Elongation-factor-4-(EC-3.6.5.n1)-(EF-4)-(Ribosomal-----



--LVKIDILLnGERVDALsfIVHRDfAQERGRfIttKLDLIPRRnFEPVQAAIGSKIIARStVKAYR  
--mVKLDILInGEPVDALSIIVHRDQAYYKGRDLVEKmkKEVIPRQmfEVAIQAAIGnKVIARStVKafr  
---SRLDVLInGDRVDALAVIHRDHAHSRGRALVEKmkKELIPRQmfDVAIQAAIGGQVVARStVKALR  
---VRLDVLInGDKVDALAVIHRDQAYYKGRDLVEKmkKELIPRQmfEVAIQAAIGGQVVARStVKALR  
---VRLDVLInGDKVDSLSSIIVHRDHAQYKGRDLVEKmkKELIPRQmfEVAIQAAIGnQVIARStVKALR  
---VRVDILInGERVDALSVILHRDQAQrGRELrERmCGIIPRQmfEVAIQAAIGSKVIARStVKALR  
--LVKLDILInGKPVDAISVIVHRDKAYQRGRQLVDKLKEIIPRQLfEVAIQAAIGnKIIARStVKALR  
--LVKLDVLInGDKVDSLSSIVHRSLSQNRGRDItERmKDLIPRQmfEVAIQAAIGSKIIARStVKALR  
--LVKVDVLInGDKVDALAVIHRDQAQSRGRELrDKLKEIIPRQmfEVAIQAAIGnHVIARStVKALR  
--LVRLDVLInGEPVDALAVIHRDQAQYKGRDLVEKmkKEIIPRQmfEVAIQAAIGnHVIARStVKALR  
--LVRLDVLInGDKVDALAVIHRDQASQHGmGRQLVEKmkKDLIPRQmfDVAIQAAIGGQVVARStVKALR  
--LVRLDVLInGDKVDALAVIHRDHAHnRGRLLVEKmkKELIPRQmfDVAIQAAIGGQVVARStVKALR  
--LVRLDVLInGDRVDALAtIVHRDHAHPRGRALVEKmkKELIPRQmfDVAIQAtLGGQVVARStVKALR  
--mVRLDVLInGDKVDALAVIHRDQAYYKGRDLVEKmkKELIPRQmfEVAIQAAIGGQVVARStVKALR  
---IKLDILInGKVDALSIIVHRDIsnGRDLVEKmkKDLIPRQmfEVAIQAAIGSKIIARStVKAmR  
---VKLDLILInGKVDALSLIVHRDIsnmnRGRDLVEKmkKDLIPRQmfEVAIQAAIGSKIIARStVKAmR  
---VKLDVLInGDKVDALSIIVHRDLSQNRGRDLVEKmkKDLIPRQmfEVAIQAAIGSKVIARStVKAmR  
---VKLDVLInGDKVDALSVIVHRDQASQSRGRDLVEKmkKDLIPRQmfEVAIQAAIGAKIIARStVKAmR  
---VRVDILInGERVDALSGIVHRDHAESRGRELrERmAKIIPRQmfEVAIQAAIGSKIIARStVKAmR  
--LVKLDVLInAEKVDALSIIVHRDLSnRGRDLVEKmkKDLIPRQmfEVAIQAAIGSKVIARStVKAmR  
--LVKLDVLInGDRVDALSnIVHRDHSYHRGRALVEKmkKELIPRQmfEVAIQAAIGGQVVARStVKAmR  
--LVRLDVLInGAVDALAHIVHRDKAYDRGKALVEKmkKIVPRQmfDVAIQAAIGtRIVARStVKAmR  
--LVKLDILLSGDEVDALsfIVHKDKAYGLARGLcDKLKEIIPRQLfEVPiQGAIGnKIIARStVKARR  
--LVKLDILLSGDEVDALsfIVHKDKAYSLARGLcDKLKEIIPRQLfEVPiQGAIGnKIIARStVKARR  
--LVKLDILInKEPVDALSIIVHKDnAYYKGRDLVDEKmkKELIPRQmfDVAIQAAIGnKVIARStVKAYR  
--LVKMDILInGDPVDALStIVHKDfAferGKAIVARLkttIPRQOFEVPIQAAIGnKVIARStVKAYR  
--LVKMDILInGDPVDALStIVHKDfAferGKAIVARLkttIPRQOFEVPIQAAIGnKVIARStVKAYR  
--LVKMDILInGDPVDALStIVHKDfAferGKAIVARLkttIPRQOFEVPIQAAIGnKVIARStVKAYR  
--mVKLDILInKEPVDALSIIVHRDQAYYKGRDLVEKmkKELIPRQmfDVAIQAAIGnKIIARStVKAYR  
--LVKVNILVnGEPVDALafIAHRDQAQIGRAIVEKLDVIPRQOFAVPIQAAIGGKIIARStVRALR  
--LVKMDILInGERVDALSLVHKDRARERARVAcEKLKEEIPRQmfEVAIQAAIGAKIIARStVSAfr  
--LVKMDILInGdVdALsfIVHKDfAferGKLIIVEKmkKELIPRQOFEVPIQAAIGHKIVARtDIKALR  
---VKLDLILInGDKVDALALIVHKDnAHYKGRQLtEKmkKELIPRQmfDVAIQAAIGGQIIARtSVKALR  
---VKLDVLInGDKVDALALIVHKDnAHYKGRQLtEKmkKELIPRQmfDVAIQAAIGGQIIARtSVKALR  
---LVKLDILLSGQVVDALAtIVHRDLAYtRGRELrERLKEIIPRQmfEVAIQAAIGAKIIARtSVKALR  
---LQKMDILInGAVDdALStIVHKDfAYSRGKIIEKmkKELIPRQmfEVPiQAAIGKIIARtIKAmR  
---LQKMDILInGAVDdALStIVHKDfAYSRGKIIEKmkKELIPRQmfEVPiQAAIGKIIARtIKAmR  
---VKLDLILInGEPVDALSIIVHKDfAferGKAIAAKLKEIIPRQmfEVPVQAAIGKIIARtIKAYR  
---VKLDILLSGEPVDALStIVHRDfAYDRGRKLAELKKEVIPRQmfEVPVQAAIGnKIIARtIKAYR  
---VKLDILInGKVDALSIIVHKSQADSRGRDLtAKmkKEIIPRQmfEVAIQAAIGSKIIARtVKALR  
---VKLDILInGKVDALSIIVHKSQADSRGRDLtAKmkKEIIPRQmfEVAIQAAIGSKIIARtVKALR  
---VKLDVLInAEKVDALAVIHRDnAHYKGRALtEKmkKELIPRQmfDVAIQAAIGGQIVARtVKALR  
---VKLDVLInGDKVDALALIVHRDKAHQGRALtEKmkKELIPRQmfDVAIQAAIGGQVVARtVKALR  
---VKLDVLInGDKVDALALIVHRDnAHYKGRALtEKmkKELIPRQmfDVAIQAAIGGQIIARtVKALR  
---VKLDVLInGDKVDALALIVHRDnAHYKGRQLtEKmkKDLIPRQmfDVAIQAAIGGQIVARtVKALR  
---VKLDVLInGKVDALALIVHRDnAHYKGRALtEKmkKELIPRQmfDVAIQAAIGGQIVARtVKALR  
---VKLDVLInGKVDALALIVHRDnAHYKGRQLtEKmkKELIPRQmfDVAIQAAIGGQIVARtVKALR  
---VKLDVLInGKVDALALIVHRDnAHYKGRALtEKmkKELIPRQmfDVAIQAAIGGQIVARtVKALR  
---LTKLDVLInGDKVDSLSSIVHRAQSQSRGREVtERmKELIPRQmfEVAIQAAIGtKIIARtVKALR  
--LVKLDILInGDKVDSLSSIVHRSLSQSRGRDvtERmKEIIPRQmfEVAIQAAIGSKVIARtVKALR  
--LVRmDILInGDKVDALAVILHRDnAQFRGRQLcEKmkKEVIPRQmfDVAIQAAIGGKVIARtVKALR  
--LIKLDmLVnGDPDLDAISVIVHRDKAYARGRDLVAVLKLKIVPRQOFEVAIQAAIGSKVIARtVKAmR  
--LVKLDILInGDKVDSLSSIVHRAAQYtRGHDVtVrMKDLIPRQmfEVAIQAAIGSKIIARtVKPLR  
---VKLDIQInGDPVEALStIVHRDKAYSVGRALtQKLEIIPRQmfRVPIQACIGAKVIASEALS AIR  
--LIKLDILInAEmvEPLStIVHRDKAYSVGRALtQKLEIIPRQmfKVPiQACIGSKVIASEALS AIR  
---VKLDILVnGDSVDALAmIVHRDKAYYVGRALtEKmkKELIPRQmfKVPiQAAIGSKVIASEHIPALR

>tr!F8I0C7\_WEIKK-Elongation-factor-4-2-(EC-3.6.5.n1)-(EF-4-2)-(Ribosomal-----  
>tr!E4THG5\_CALNY-Elongation-factor-4-(EC-3.6.5.n1)-(EF-4)-(Ribosomal-----  
>tr!F4BIF3\_FRACN-Elongation-factor-4-(EC-3.6.5.n1)-(EF-4)-(Ribosomal-----  
>sp!A0Q453!LEPA\_FRATN-Elongation-factor-4-(EC-3.6.5.n1)-(EF-4)-(Ribosomal-----  
>tr!C8N8P7\_9GAMM-Elongation-factor-4-(EC-3.6.5.n1)-(EF-4)-(Ribosomal-----  
>tr!G4DJ67\_9GAMM-Elongation-factor-4-(EC-3.6.5.n1)-(EF-4)-(Ribosomal-----  
>tr!E8T458\_THEA1-Elongation-factor-4-(EC-3.6.5.n1)-(EF-4)-(Ribosomal-----  
>tr!D3RT24\_ALLVD-Elongation-factor-4-(EC-3.6.5.n1)-(EF-4)-(Ribosomal-----  
>sp!A7Z6W5!LEPA\_BACA2-Elongation-factor-4-(EC-3.6.5.n1)-(EF-4)-(Ribosomal-----  
>tr!C7RA53\_KANKD-Elongation-factor-4-(EC-3.6.5.n1)-(EF-4)-(Ribosomal-----  
>sp!B3PLG4!LEPA\_CELJU-Elongation-factor-4-(EC-3.6.5.n1)-(EF-4)-(Ribosomal-----  
>tr!F8G399\_PSEPU-Elongation-factor-4-(EC-3.6.5.n1)-(EF-4)-(Ribosomal-----  
>sp!Q1QX26!LEPA\_CHRSD-Elongation-factor-4-(EC-3.6.5.n1)-(EF-4)-(Ribosomal-----  
>sp!B0TW33!LEPA\_FRAP2-Elongation-factor-4-(EC-3.6.5.n1)-(EF-4)-(Ribosomal-----  
>tr!Q1RIY3\_RICBR-GTP-binding-protein-LepA-[RBE\_0600]-[Rickettsia-bellii-(strain-----  
>sp!Q608M4!LEPA\_MEFCA-Elongation-factor-4-(EC-3.6.5.n1)-(EF-4)-(Ribosomal-----  
>tr!F9ZWW1\_METMM-Elongation-factor-4-(EC-3.6.5.n1)-(EF-4)-(Ribosomal-----  
>tr!F5VA33\_MEFAL-Elongation-factor-4-(EC-3.6.5.n1)-(EF-4)-(Ribosomal-----  
>tr!D3SBU1\_THISK-Elongation-factor-4-(EC-3.6.5.n1)-(EF-4)-(Ribosomal-----  
>tr!G3ISF8\_9GAMM-Elongation-factor-4-(EC-3.6.5.n1)-(EF-4)-(Ribosomal-----  
>tr!A1WT19\_HALHL-Elongation-factor-4-(EC-3.6.5.n1)-(EF-4)-(Ribosomal-----  
>tr!F7QDT1\_9GAMM-Elongation-factor-4-(EC-3.6.5.n1)-(EF-4)-(Ribosomal-----  
>tr!C5UP89\_CLOBO-Elongation-factor-4-(EC-3.6.5.n1)-(EF-4)-(Ribosomal-----  
>tr!B6GCG4\_9ACTN-Elongation-factor-4-(EC-3.6.5.n1)-(EF-4)-(Ribosomal-----  
>tr!E0U4R5\_BACPZ-Elongation-factor-4-(EC-3.6.5.n1)-(EF-4)-(Ribosomal-----  
>sp!Q038N6!LEPA\_LACC3-Elongation-factor-4-(EC-3.6.5.n1)-(EF-4)-(Ribosomal-----  
>sp!B3WEQ5!LEPA\_LACCB-Elongation-factor-4-(EC-3.6.5.n1)-(EF-4)-(Ribosomal-----  
>tr!G6CGA3\_LACCU-GTP-binding-protein-LepA-[lepA]-[Lactobacillus-curvatus-CRL-705]-----  
>sp!B9KIB5!LEPA\_ANAMF-Elongation-factor-4-(EC-3.6.5.n1)-(EF-4)-(Ribosomal-----  
>tr!E8WTS3\_GEOS8-Elongation-factor-4-(EC-3.6.5.n1)-(EF-4)-(Ribosomal-----  
>tr!E1YDS8\_9DELT-Elongation-factor-4-(EC-3.6.5.n1)-(EF-4)-(Ribosomal-----  
>tr!F9MAJ2\_9STRE-Elongation-factor-4-2-(EC-3.6.5.n1)-(EF-4-2)-(Ribosomal-----  
>sp!P26843!LEPA\_PSEFL-Elongation-factor-4-(EC-3.6.5.n1)-(EF-4)-(Ribosomal-----  
>sp!C3K6G8!LEPA\_PSEFS-Elongation-factor-4-(EC-3.6.5.n1)-(EF-4)-(Ribosomal-----  
>sp!Q83BK3!LEPA\_COXBU-Elongation-factor-4-(EC-3.6.5.n1)-(EF-4)-(Ribosomal-----  
>tr!B6FJK5\_9CLOT-Elongation-factor-4-(EC-3.6.5.n1)-(EF-4)-(Ribosomal-----  
>tr!D0BPH9\_9FUSO-Elongation-factor-4-(EC-3.6.5.n1)-(EF-4)-(Ribosomal-----  
>tr!F8CTU6\_BACTR-Elongation-factor-4-(EC-3.6.5.n1)-(EF-4)-(Ribosomal-----  
>tr!F5XAN5\_PORGT-Elongation-factor-4-(EC-3.6.5.n1)-(EF-4)-(Ribosomal-----  
>tr!G7U8T6\_PROAA-GTP-binding-protein-LepA-[TIIST44\_10145]-[Propionibacterium-acnes-----  
>tr!G2FE87\_9GAMM-Elongation-factor-4-(EC-3.6.5.n1)-(EF-4)-(Ribosomal-----  
>sp!Q4ZPD8!LEPA\_PSEU2-Elongation-factor-4-(EC-3.6.5.n1)-(EF-4)-(Ribosomal-----  
>sp!C1DQSO!LEPA\_AZOVd-Elongation-factor-4-(EC-3.6.5.n1)-(EF-4)-(Ribosomal-----  
>sp!B1J4D8!LEPA\_PSEFW-Elongation-factor-4-(EC-3.6.5.n1)-(EF-4)-(Ribosomal-----  
>tr!F6AA61\_PSEF1-Elongation-factor-4-(EC-3.6.5.n1)-(EF-4)-(Ribosomal-----  
>sp!Q87XF8!LEPA\_PSESM-Elongation-factor-4-(EC-3.6.5.n1)-(EF-4)-(Ribosomal-----  
>sp!P0DC23!LEPA\_STRPQ-Elongation-factor-4-(EC-3.6.5.n1)-(EF-4)-(Ribosomal-----  
>tr!G2Z088\_9FLAO-Elongation-factor-4-(EC-3.6.5.n1)-(EF-4)-(Ribosomal-----  
>tr!G2DZA0\_9GAMM-Elongation-factor-4-(EC-3.6.5.n1)-(EF-4)-(Ribosomal-----  
>tr!Q7PBA0\_RICSI-Elongation-factor-4-(EC-3.6.5.n1)-(EF-4)-(Ribosomal-----  
>sp!A9GWZ4!LEPA\_SORC5-Elongation-factor-4-(EC-3.6.5.n1)-(EF-4)-(Ribosomal-----  
>tr!G4DQ27\_9GAMM-Elongation-factor-4-(EC-3.6.5.n1)-(EF-4)-(Ribosomal-----  
>sp!B1WWD8!LEPA\_CYAA5-Elongation-factor-4-(EC-3.6.5.n1)-(EF-4)-(Ribosomal-----  
>sp!Q9FNM5!GUPF\_ARATH-Translation-factor-GUP1-homolog,-chloroplastic-precursor-(EC-----  
>sp!B7K327!LEPA\_CYP8-Elongation-factor-4-(EC-3.6.5.n1)-(EF-4)-(Ribosomal-----

--LVKLDImVnGDVVDALAmIVHRDKAYnVGRALtEKLKELIPRHQfKVPiQAAIGAKIIASESHIPALR  
--LVKLDImVnGDPVDALAmIVHRDKAYyVGRALtEKLKELIPRHQfKVPiQAAIGSKIIASESHIPALR  
--LVRmDILInSEPVdPLatIVHRDKAYyVGRALtEKLKELIPRHQfKIPIQAAIGSRVIASESIPALR  
--LVRDLVLIInGEKADPLttIVHRDKAYGVGKSLVtEKLKELIPRQfKIPIQASIGSRVIASESISAmr  
--LIKLDIqInGERVEPLatIVHKDKAYAVGRALtQKLKELIPRQmfKVPiQAcIGAKVIASESISAIR  
--LIRLDIqInGDPVdPLatIVHKDKAYSVGRALtQKLKELIPRQfKVPiQAcIGAKVIASESISAIR  
---VKVDILInSQSVdALSALIHADnAYnIGKKmceKLRLELIPRQfDIPIQAAIGAKIISREtIKALR  
--LVKLDILInGEQIDALSfIVHESKAYSrGKmcEKLKDEIPRHQfPIPIQAAVGNkVVISREtIKALR  
--LVKVDILInASPVdALSALIHtDnAYSIGKKmceKLRQLIPRQfDIPIQAAIGAKIISREtIKALR  
--LVRVDILInAQPVdALSALIHfDnAQnIGKKmceKLRLELIPRQfDIPIQAAIGAKIISREtIKALR  
--LVRVDILInAQPVdALSALVHfDnAYDIGKRmceKLRLELIPRQfDIPIQAAIGSKIISREtIKALR  
--LVRVDILInAQPVdALSALVHfDnAYHIGKKmceKLRLELIPRQfDIPIQAAIGSKIISREtIKALR  
--LVRVDILInAQVdALSALIHfDnAYtIGKKmceKLRLELIPRQfDIPIQAAIGAKIISREtIKALR  
--LVRVDILInSQPVdALSALIHADnAtnIGKKmceKLRQLIPRQfDIPIQAAIGAKIISREtIKALR  
---VkmDILInGEQVdALSfIVHREfAYQRGKVIVtEKLKELIPRQfEPIQAAIGnKIISREtIKAmr  
--LVKLDVLInGQVVDALSfIVHRDQAYSrGKALVEKLKELIPRQLfEPIQAAIGSRVVISREtIKAmr  
--LIKLDILInGEPVDALStLthfDnAYDLGHRmceEKLKDLIPRQfDIAIQAAIGAKIISREtIKAVR  
--LIKLDILInGESPVDALSfIVHVDnAVSLGKRmceEKLKELIPRQfDIAVQAAIGAKIISREtIKAVR  
--LVKLDILInGEPVDALStLthfDnAYDLGKRmceEKLKDLIPRQfDIAIQAAIGAKIISREtIKAVR  
--LVKLDILInGEPVDALStLthfDnAYDLGRRmceEKLKDLIPRQfDIAIQAAIGAKIISREtIKAVR  
--LVKLDILInGEPVDALStLthIDnAYDmGRRmceEKLKELIPRQfDIAIQAAIGAKIISREtIKAVR  
--LVKLDILInGEPVDALStLthVDnAYnLGKRmceEKLKELIPRQfDIAIQAAIGAKIISREtIKAVR  
--LARLDILInGDPVDALSVIVHRERAYLRGREVcQKLKEVIPKQmYEVAIQAAIGAKIISREtISAIR  
--LVKLDVLLnGEPVDALStVHRSKAYEwGRKLCQKLKtIIPKQmYEVAIQAAIGSRVVISREtISAIR  
--LARLDILInGDPVDALSVIVHRERAYLRGREVcQKLKEVIPKQmYEVAIQAAIGAKIISREtISAIR  
--LVKLDVLLnGdTvDALSfIVHRSKAYDwGKLCIKLKAIPKQmYEVAIQAAIGSKVVISREtISAIR  
--LVKLDVLLnGEPVDALSfIVHRSKAYDwGRKLCGLKGIIPKQmYEVAIQAAIGSRVVISREtISAIR  
--LVKLDVLLnGEPVDALSfIVHRSKAYEwGRKLCQKLKGIIPKQmYEVAIQAAIGSRVVISREtISAIR  
--LVKLDVLLnGdTvDALSfIVHRSKAYEwGKLCQKLKGIIPKQmYEVAIQAAIGAKIISREtISAIR  
--LVRVDILInAQPVdALSALIHADnAVHIGKRmceEKLKELIPRQfDIPIQAAIGAKIISREtIKALR  
--LVRVDILInAQPVdALSALIHADnAVnIGKRmceEKLKELIPRQfDIPIQAAIGSKVVISREtIKALR  
---VKVDILInGEKVDALSfIVHRDnAYSrGKVLVErLRKIIDRQfDIAIQAAIGAKIISREtVKALR  
--LVKVDVLLnGnKVDALSfIVHRDnAYSrGKVLVErLRKIIDRQfDIAIQAAIGAKIISREtVKALR  
--LVKVDVLLnGnVVDALSfIVHRDnAYSrGKVLVErLRKIIDRQfDIAIQAAIGAKIISREtVKALR  
--LVRVDILInGQAVdALSfIVHRDnAYSrGKVLVErLRKIIDRQfDIAIQAAIGAKIISREtVKALR  
--LVKVDVLLnGQPVdALSfIVHRDnAYSrGKVLVErLRKIIDRQfDIAIQAAIGAKIISREtVKALR  
--LVRDLVLLnAQPVdALSALIHADnAQHIGKKmceEKLKELIPRQfDIPIQAAIGAKIISREtVKALR  
---VkmDImLnGEQVdALSfIVHRDnAYSrGRIIcEKLKELIPRQmfEVPiQAAIGQKIISREtVKAmr  
--LVKLDfLInGERVDALSfIVHRDKAVDRAKnAcKKLRDEIPRQmfKIAIQGAIGGKIISREtVSAYR  
--LVRDLVLLnGDEVDALSfIVHRDKAYGmARALcDKLKEIIPRQfEVPiQGAIGnKIISRStVKARR  
---VrmDVLInGDRVDALAVIHKDKtRtYGRALcEKLKELIPRQmfDVAIQSAIGnQIVSRStVKALR  
--LVKLDILInGDEVDALSfIVHKDKAYALARGLcDKLKEIIPRQfEVPiQGAIGnKIISRStVKARR  
---VKLDILInGDPVdAFsvIHRDKAntYnAicVKLKDIPRQfDVAIQGAIGGKIISRStVKAVR  
--LVKLDILInGAGVVDALSfIVHKDKAYDLARGLcDRKGIIPQQLfEVPiQGAIGnKIISRStVRARR  
--LVKLDILInGAGVVDALSfIVHKDKAYSLARGLcDRKGIIPQQLfEVPiQGAIGnKIISRStVRARR  
--LVKLnILLAGDEVdALSfIVHKDKAYPmARALcDKLKEIIPQQLfEVPiQGAIGSKIISRStVRARR

! \*!

--LVKMDILInGntVEELvtVHVKDKAHSIGKAicERLKDSLPRQLfEIAIQAAIGSKIIAREtVKAYR

>tr!E0UCU1\_CYP2-GTP-binding-protein-LepA-[lepA]-[Cyanotheca-sp.-(strain-PCC-7822)]-----  
>sp!B0JQT7!LEPA\_MICAN-Elongation-factor-4-(EC-3.6.5.1)-(EF-4)-(Ribosomal-----  
>sp!Q5N390!LEPA\_SYN6-Elongation-factor-4-(EC-3.6.5.1)-(EF-4)-(Ribosomal-----  
>tr!B5IP12\_9CHRO-GTP-binding-protein-LepA-[lepA]-[Cyanobium-sp.-PCC-7001]-----  
>sp!A5B4D2!GUPF\_VITVI-Translation-factor-GUF1-homolog,-chloroplastic-precursor-(EC-----  
>sp!B9GHA6!GUPF\_POPTR-Translation-factor-GUF1-homolog,-chloroplastic-precursor-(EC-----  
>tr!C7M3J6\_CAPOD-Elongation-factor-4-(EC-3.6.5.1)-(EF-4)-(Ribosomal-----  
>sp!A8MF46!LEPA\_ALK00-Elongation-factor-4-(EC-3.6.5.1)-(EF-4)-(Ribosomal-----  
>tr!C0BI27\_9BACT-Elongation-factor-4-(EC-3.6.5.1)-(EF-4)-(Ribosomal-----  
>tr!G0L4I3\_ZOBGA-Elongation-factor-4-(EC-3.6.5.1)-(EF-4)-(Ribosomal-----  
>tr!A4CI69\_ZOBBH-Elongation-factor-4-(EC-3.6.5.1)-(EF-4)-(Ribosomal-----  
>tr!G2PP86\_MURRD-Elongation-factor-4-(EC-3.6.5.1)-(EF-4)-(Ribosomal-----  
>tr!B4BLV2\_9BACI-Elongation-factor-4-(EC-3.6.5.1)-(EF-4)-(Ribosomal-----  
>tr!A4APC6\_MARSH-Elongation-factor-4-(EC-3.6.5.1)-(EF-4)-(Ribosomal-----  
>tr!F3A9A0\_9BACL-Elongation-factor-4-(EC-3.6.5.1)-(EF-4)-(Ribosomal-----  
>tr!D3T886\_THETA-Elongation-factor-4-(EC-3.6.5.1)-(EF-4)-(Ribosomal-----  
>tr!F7L7Y2\_BACOV-Elongation-factor-4-(EC-3.6.5.1)-(EF-4)-(Ribosomal-----  
>tr!E4T776\_PALPW-Elongation-factor-4-(EC-3.6.5.1)-(EF-4)-(Ribosomal-----  
>tr!A5Z33\_9FTRM-Elongation-factor-4-(EC-3.6.5.1)-(EF-4)-(Ribosomal-----  
>tr!D9ZZ93\_9THEO-GTP-binding-protein-LepA-(Fragment)-[lepA]-[Thermoanaerobacter-----  
>tr!F3PX0\_9BACE-Elongation-factor-4-(EC-3.6.5.1)-(EF-4)-(Ribosomal-----  
>tr!F7M738\_9BACE-Elongation-factor-4-(EC-3.6.5.1)-(EF-4)-(Ribosomal-----  
>tr!F3PG32\_9BACE-Elongation-factor-4-(EC-3.6.5.1)-(EF-4)-(Ribosomal-----  
>sp!Q88MY7!LEPA\_PSEPK-Elongation-factor-4-(EC-3.6.5.1)-(EF-4)-(Ribosomal-----  
>sp!B4S9B7!LEPA\_PROA2-Elongation-factor-4-(EC-3.6.5.1)-(EF-4)-(Ribosomal-----  
>tr!F8H1B9\_PSEUT-Elongation-factor-4-(EC-3.6.5.1)-(EF-4)-(Ribosomal-----  
>tr!Q0YS96\_9CHLB-Elongation-factor-4-(EC-3.6.5.1)-(EF-4)-(Ribosomal-----  
>sp!A4SFN5!LEPA\_PROVI-Elongation-factor-4-(EC-3.6.5.1)-(EF-4)-(Ribosomal-----  
>sp!B3EE17!LEPA\_CHLL2-Elongation-factor-4-(EC-3.6.5.1)-(EF-4)-(Ribosomal-----  
>sp!B4SBG4!LEPA\_PELPB-Elongation-factor-4-(EC-3.6.5.1)-(EF-4)-(Ribosomal-----  
>sp!Q3ATB2!LEPA\_CHLCH-Elongation-factor-4-(EC-3.6.5.1)-(EF-4)-(Ribosomal-----  
>tr!F7Z8Y1\_MYCBH-Elongation-factor-4-(EC-3.6.5.1)-(EF-4)-(Ribosomal-----  
>tr!E6X8W9\_CELAD-Elongation-factor-4-(EC-3.6.5.1)-(EF-4)-(Ribosomal-----  
>tr!E1WY76\_BACMS-Elongation-factor-4-(EC-3.6.5.1)-(EF-4)-(Ribosomal-----  
>tr!E8UU87\_THEBF-Elongation-factor-4-(EC-3.6.5.1)-(EF-4)-(Ribosomal-----  
>tr!B0NE80\_EUBSP-Elongation-factor-4-(EC-3.6.5.1)-(EF-4)-(Ribosomal-----  
>tr!F4B1R9\_KROS4-Elongation-factor-4-(EC-3.6.5.1)-(EF-4)-(Ribosomal-----  
>tr!A2TS24\_9FLAO-Elongation-factor-4-(EC-3.6.5.1)-(EF-4)-(Ribosomal-----  
>tr!B4X3Q5\_9GAMM-Elongation-factor-4-(EC-3.6.5.1)-(EF-4)-(Ribosomal-----  
>tr!F5LN2\_9BACL-Elongation-factor-4-(EC-3.6.5.1)-(EF-4)-(Ribosomal-----  
>tr!D5H5U9\_SALRM-Elongation-factor-4-(EC-3.6.5.1)-(EF-4)-(Ribosomal-----  
>tr!E1QVD7\_OLSUV-Elongation-factor-4-(EC-3.6.5.1)-(EF-4)-(Ribosomal-----  
>tr!Q1MXQ0\_9GAMM-GTP-binding-protein-LepA-(Fragment)-[RED65\_03805]-[Bermanella-----  
>tr!G1WG00\_9ACTN-Elongation-factor-4-(EC-3.6.5.1)-(EF-4)-(Ribosomal-----  
>tr!C9RNT3\_FIBSS-Elongation-factor-4-(EC-3.6.5.1)-(EF-4)-(Ribosomal-----  
>tr!D3VQZ1\_MYCA6-Elongation-factor-4-(EC-3.6.5.1)-(EF-4)-(Ribosomal-----  
>tr!B9CKK0\_9ACTN-Elongation-factor-4-(EC-3.6.5.1)-(EF-4)-(Ribosomal-----  
>tr!E2MRE9\_FRANO-Elongation-factor-4-(EC-3.6.5.1)-(EF-4)-(Ribosomal-----  
>sp!Q8N442!GUF1\_HUMAN-Translation-factor-GUF1,-mitochondrial-precursor-(EC-3.6.5.-)-----
