# Supplementary material
Source: PubMed Central journal article supplement (PMC5070883)

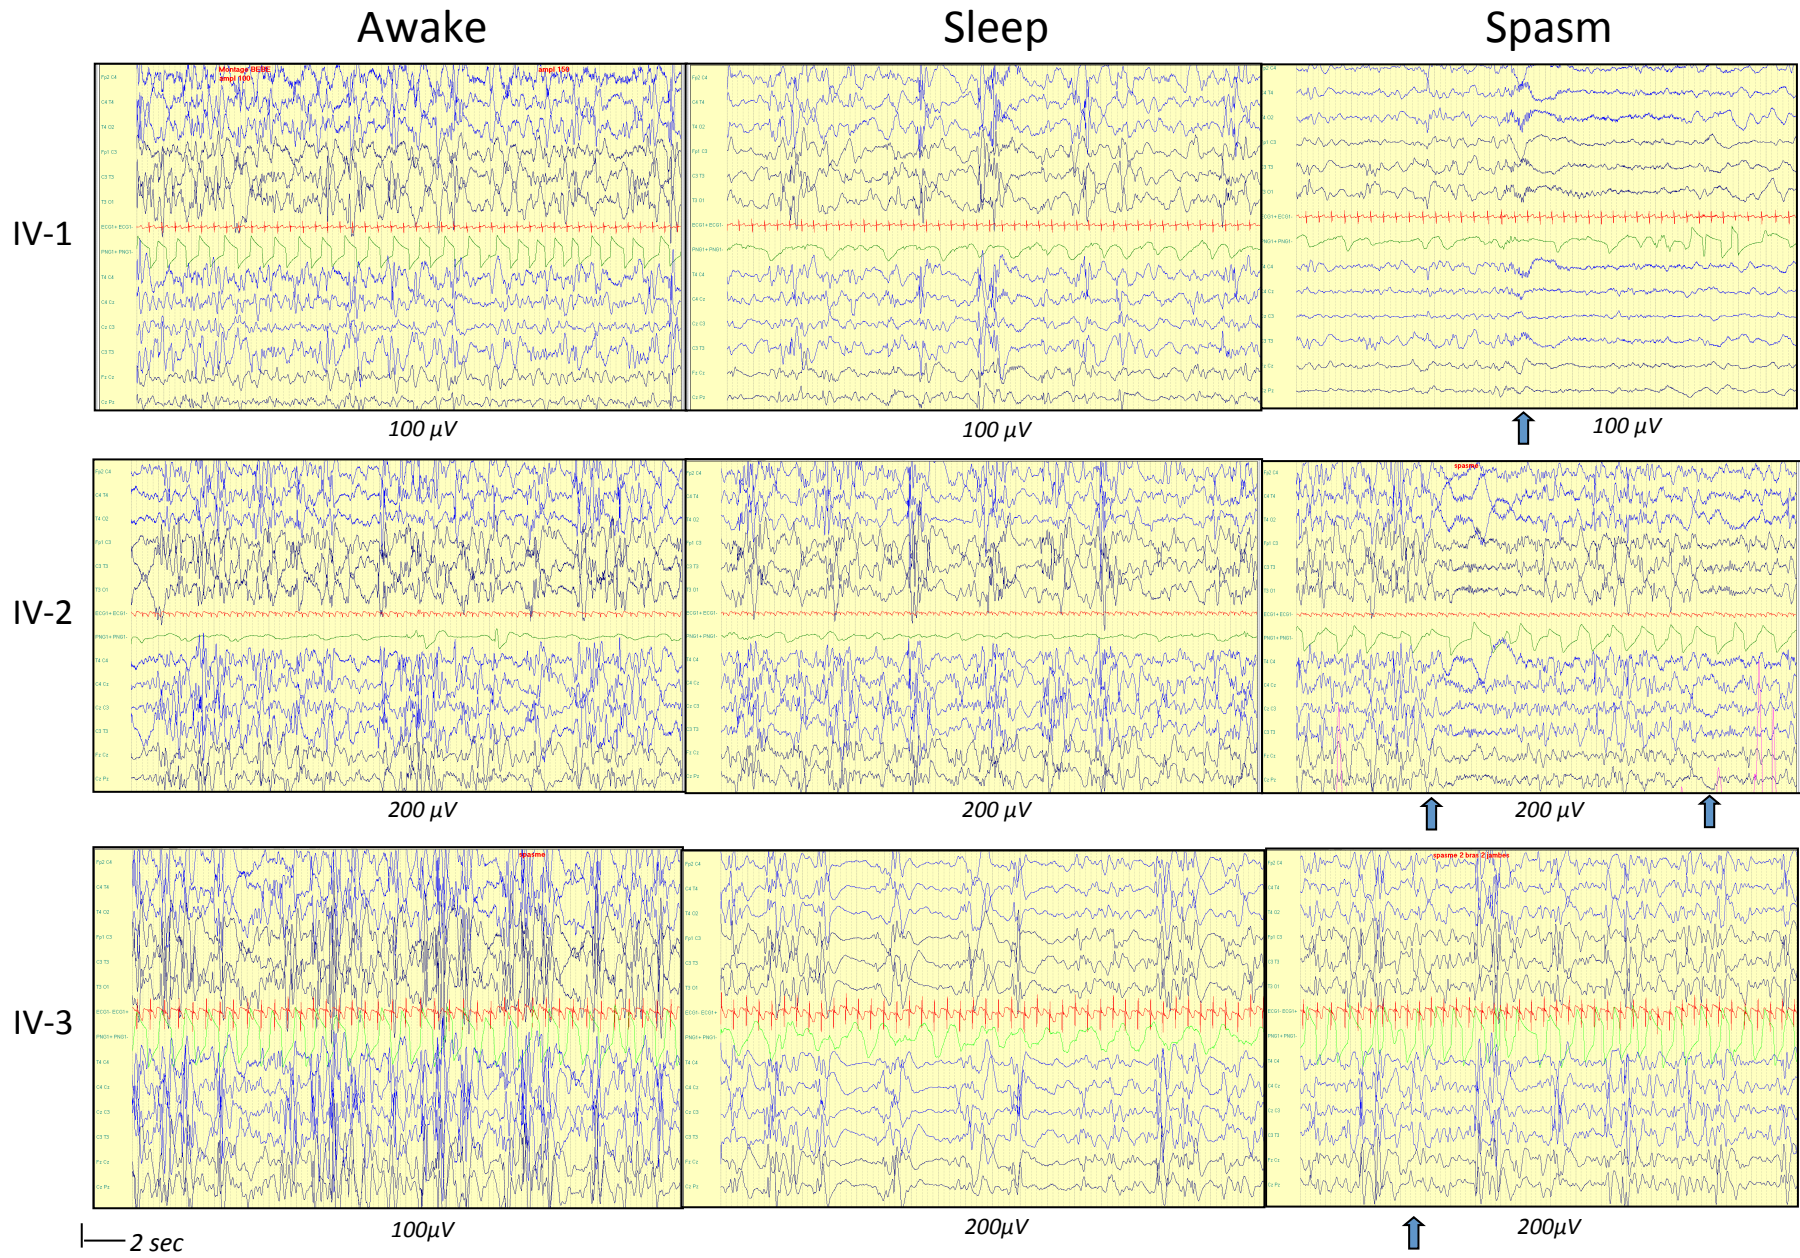

**Supplementary Figure S1**

Supplement: ejhg2015227x1.pdf [file ejhg2015227x1.pdf]

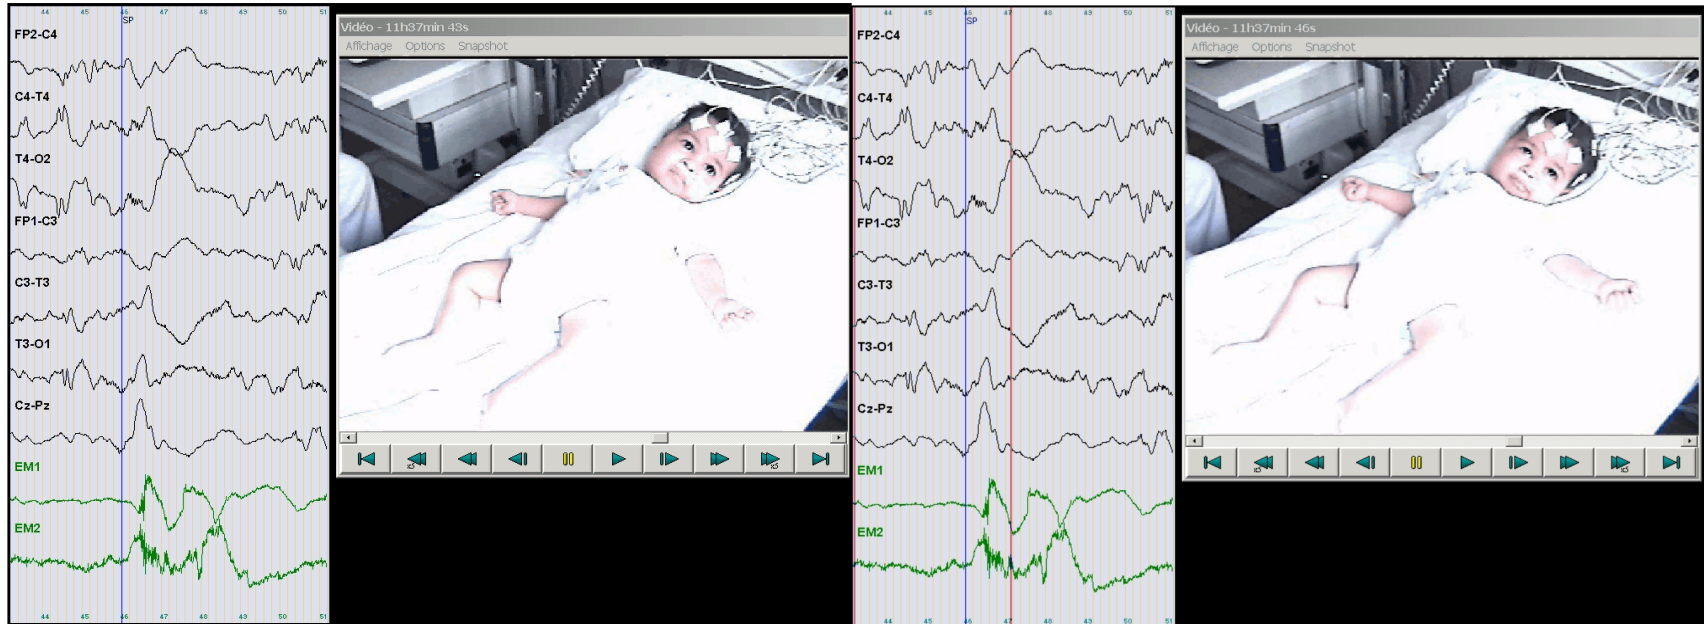

**Supplementary Figure S2**

Supplement: ejhg2015227x2.pdf [file ejhg2015227x2.pdf]

### Supplementary Figure S3

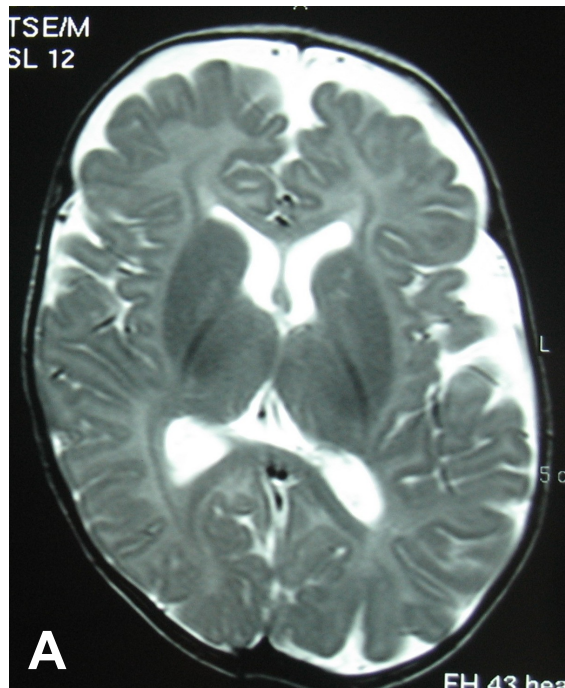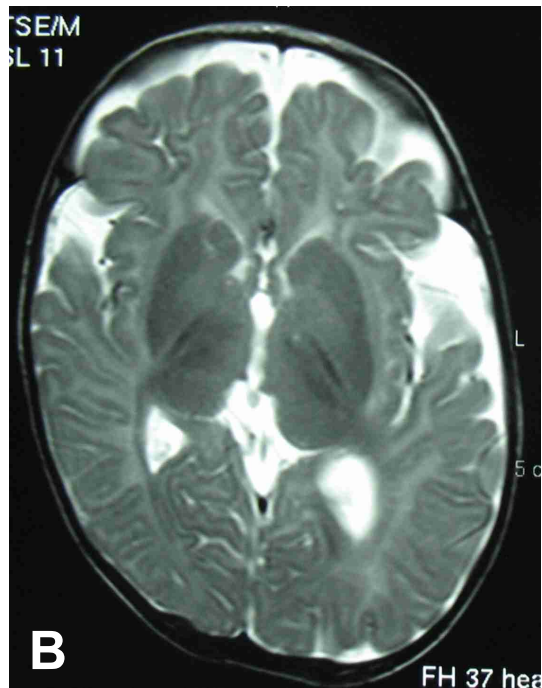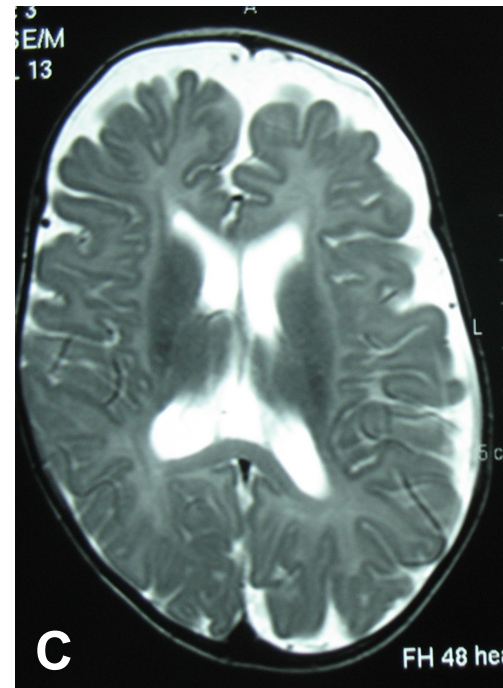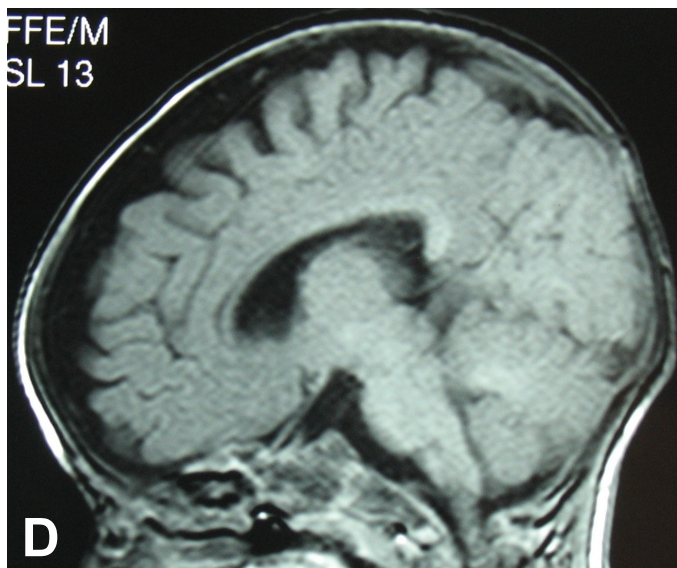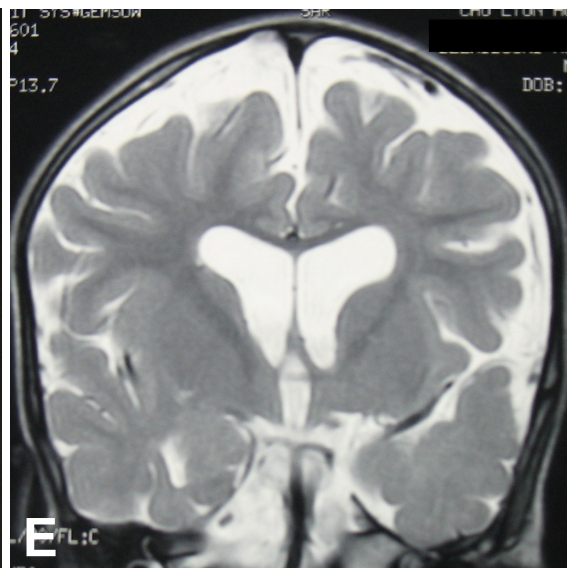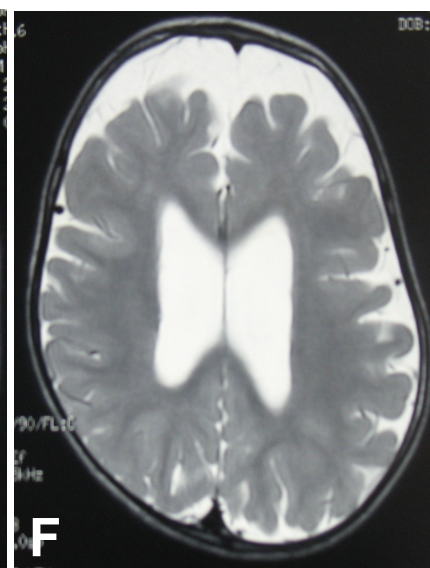

Supplement: ejhg2015227x3.pdf [file ejhg2015227x3.pdf]
